# Supplementary material for: Toward Simulation of Fe(II) Low-Spin → High-Spin Photoswitching by Synergistic Spin-Vibronic Dynamics
Source: PubMed Central journal article supplement (PMC8908767; doi:10.1021/acs.jctc.1c01184), 2022-02-24
Supplement: ct1c01184_si_001.pdf [file ct1c01184_si_001.pdf]

Supporting Information for "Towards Simulation of  
Fe(II) Low-Spin  $\rightarrow$  High-Spin Photoswitching by  
Synergistic Spin-Vibronic Dynamics"

Mátyás Pápai\*

Wigner Research Centre for Physics, P.O. Box 49, H-1525 Budapest,  
Hungary

Email: papai.matyas@wigner.hu

## Contents

|                                                          |     |
|----------------------------------------------------------|-----|
| S1 Normal Modes                                          | S2  |
| S2 Vibronic Coupling Parameters and Spin-Orbit Couplings | S3  |
| S3 Diabatic and Adiabatic/Spin-Diabatic Potentials       | S22 |
| S4 Comparison of B3LYP* and CASPT2 QD                    | S31 |
| S5 Description of Vibrational Dynamics by TSH and QD     | S31 |

## S1 Normal Modes

Table S1 reports the ground-state normal modes of  $[\text{Fe}(\text{NCH})_6]^{2+}$ , calculated at the B3LYP\*/TZVP level of theory:

**Table S1:** DFT-calculated (B3LYP\*/TZVP) ground-state normal modes of  $[\text{Fe}(\text{NCH})_6]^{2+}$ .

| Mode       | Symmetry ( $O_h$ ) | Freq. ( $\text{cm}^{-1}$ ) | Character                                |
|------------|--------------------|----------------------------|------------------------------------------|
| $\nu_1$    | $t_{2u}$           | 87.1                       | Rocking, bending (Fe-N-C)                |
| $\nu_2$    | $t_{2u}$           | 87.1                       | Rocking, bending (Fe-N-C)                |
| $\nu_3$    | $t_{2u}$           | 87.1                       | Rocking, bending (Fe-N-C)                |
| $\nu_4$    | $t_{2g}$           | 106.7                      | Rocking, bending (Fe-N-C)                |
| $\nu_5$    | $t_{2g}$           | 106.7                      | Rocking, bending (Fe-N-C)                |
| $\nu_6$    | $t_{2g}$           | 106.7                      | Rocking, bending (Fe-N-C)                |
| $\nu_7$    | $t_{1u}$           | 125.0                      | Rocking, bending (Fe-N-C)                |
| $\nu_8$    | $t_{1u}$           | 125.0                      | Rocking, bending (Fe-N-C)                |
| $\nu_9$    | $t_{1u}$           | 125.0                      | Rocking, bending (Fe-N-C)                |
| $\nu_{10}$ | $t_{1g}$           | 248.6                      | Rocking, bending (Fe-N-C)                |
| $\nu_{11}$ | $t_{1g}$           | 248.6                      | Rocking, bending (Fe-N-C)                |
| $\nu_{12}$ | $t_{1g}$           | 248.6                      | Rocking, bending (Fe-N-C)                |
| $\nu_{13}$ | $e_g$              | <b>299.1</b>               | <b>Antisymmetric stretching (Fe-N)</b>   |
| $\nu_{14}$ | $e_g$              | <b>299.1</b>               | <b>Antisymmetric stretching (Fe-N)</b>   |
| $\nu_{15}$ | $a_{1g}$           | <b>318.4</b>               | <b>Symmetric stretching (Fe-N)</b>       |
| $\nu_{16}$ | $t_{1u}$           | 334.3                      | Fe off-center movement, bending (Fe-N-C) |
| $\nu_{17}$ | $t_{1u}$           | 334.3                      | Fe off-center movement, bending (Fe-N-C) |
| $\nu_{18}$ | $t_{1u}$           | 334.3                      | Fe off-center movement, bending (Fe-N-C) |
| $\nu_{19}$ | $t_{2u}$           | 361.1                      | Twisting (Fe-N-C, N-Fe-N)                |
| $\nu_{20}$ | $t_{2u}$           | 361.1                      | Twisting (Fe-N-C, N-Fe-N)                |
| $\nu_{21}$ | $t_{2u}$           | 361.1                      | Twisting (Fe-N-C, N-Fe-N)                |
| $\nu_{22}$ | $t_{2g}$           | 376.0                      | Bending (Fe-N-C, N-Fe-N)                 |
| $\nu_{23}$ | $t_{2g}$           | 376.0                      | Bending (Fe-N-C, N-Fe-N)                 |
| $\nu_{24}$ | $t_{2g}$           | 376.0                      | Bending (Fe-N-C, N-Fe-N)                 |
| $\nu_{25}$ | $t_{1u}$           | 464.8                      | Bending (Fe-N-C, N-Fe-N)                 |
| $\nu_{26}$ | $t_{1u}$           | 464.8                      | Bending (Fe-N-C, N-Fe-N)                 |
| $\nu_{27}$ | $t_{1u}$           | 464.8                      | Bending (Fe-N-C, N-Fe-N)                 |
| $\nu_{28}$ | $t_{1g}$           | 786.0                      | Bending (N-C-H)                          |
| $\nu_{29}$ | $t_{1g}$           | 786.0                      | Bending (N-C-H)                          |
| $\nu_{30}$ | $t_{1g}$           | 786.0                      | Bending (N-C-H)                          |
| $\nu_{31}$ | $t_{2u}$           | 787.0                      | Bending (N-C-H)                          |
| $\nu_{32}$ | $t_{2u}$           | 787.0                      | Bending (N-C-H)                          |
| $\nu_{33}$ | $t_{2u}$           | 787.0                      | Bending (N-C-H)                          |
| $\nu_{34}$ | $t_{1u}$           | 787.7                      | Bending (N-C-H)                          |
| $\nu_{35}$ | $t_{1u}$           | 787.7                      | Bending (N-C-H)                          |
| $\nu_{36}$ | $t_{1u}$           | 787.7                      | Bending (N-C-H)                          |

|            |          |        |                                |
|------------|----------|--------|--------------------------------|
| $\nu_{37}$ | $t_{2g}$ | 788.9  | Bending (N-C-H)                |
| $\nu_{38}$ | $t_{2g}$ | 788.9  | Bending (N-C-H)                |
| $\nu_{39}$ | $t_{2g}$ | 788.9  | Bending (N-C-H)                |
| $\nu_{40}$ | $e_g$    | 2238.4 | Antisymmetric stretching (N-C) |
| $\nu_{41}$ | $e_g$    | 2238.4 | Antisymmetric stretching (N-C) |
| $\nu_{42}$ | $t_{1u}$ | 2239.1 | Antisymmetric stretching (N-C) |
| $\nu_{43}$ | $t_{1u}$ | 2239.1 | Antisymmetric stretching (N-C) |
| $\nu_{44}$ | $t_{1u}$ | 2239.1 | Antisymmetric stretching (N-C) |
| $\nu_{45}$ | $a_{1g}$ | 2249.8 | Symmetric stretching (N-C)     |
| $\nu_{46}$ | $e_g$    | 3373.1 | Antisymmetric stretching (C-H) |
| $\nu_{47}$ | $e_g$    | 3373.1 | Antisymmetric stretching (C-H) |
| $\nu_{48}$ | $t_{1u}$ | 3373.2 | Antisymmetric stretching (C-H) |
| $\nu_{49}$ | $t_{1u}$ | 3373.2 | Antisymmetric stretching (C-H) |
| $\nu_{50}$ | $t_{1u}$ | 3373.2 | Antisymmetric stretching (C-H) |
| $\nu_{51}$ | $a_{1g}$ | 3378.7 | Symmetric stretching (C-H)     |

## S2 Vibronic Coupling Parameters and Spin-Orbit Couplings

All below parameters were obtained by using DFT/TD-DFT (B3LYP\*/TZVP) quantum chemistry for the following diabatic Hamiltonians: i) VCHAM-B3LYP\* and ii) LVC-B3LYP\*. For i), we introduced the upper  $S_4$ – $S_6$  singlet states for VCHAM fitting along the two antisymmetric modes  $\nu_{13}$  and  $\nu_{14}$ ; this is required because the  ${}^1T_{1g}$  and  ${}^1T_{2g}$  manifolds interact along  $\nu_{13}$  and  $\nu_{14}$ . The dynamics simulations were performed with the  ${}^1T_{1g}$  singlet states only, as the  ${}^1T_{2g}$  states are energetically inaccessible. The utilized spin-orbit coupling (SOC) matrix<sup>1</sup> is given in Tables S9–S14 and the *ab initio* data for the calculation of SOC along the  $\nu_{13}$  and  $\nu_{15}$  Fe-N stretching modes are given in ref. 1.

**Table S2:** Zeroth-order coefficients  $\varepsilon^{(\alpha)}$ , given in eV. The tabulated  $\varepsilon^{(\alpha)}$  values are the B3LYP\*-calculated (DFT/TD-DFT) vertical excitation energies at the Franck-Condon (FC) geometry. Both FC adiabatic and diabatic state labels, the latter in parantheses, are given. Note that the  $S_4$ ,  $S_5$ ,  $S_6$  ( ${}^1T_{2g}$ ) states were not used in the QD simulations but are reported here for completeness. These B3LYP\*  $\varepsilon^{(\alpha)}$  values were used in the simulations both with VCHAM-B3LYP\* and LVC-B3LYP\*. For comparison, the CASPT2 values from ref. 1 are also shown.

| State                  | $\varepsilon^{(\alpha)}$ – B3LYP* | $\varepsilon^{(\alpha)}$ – CASPT2 |
|------------------------|-----------------------------------|-----------------------------------|
| $S_0$ ( ${}^1GS$ )     | 0.000                             | 0.000                             |
| $S_1$ ( ${}^1T_{1g}$ ) | 2.368                             | 2.266                             |
| $S_2$ ( ${}^1T_{1g}$ ) | 2.368                             | 2.266                             |
| $S_3$ ( ${}^1T_{1g}$ ) | 2.368                             | 2.266                             |
| $S_4$ ( ${}^1T_{2g}$ ) | 3.384                             | 3.251                             |
| $S_5$ ( ${}^1T_{2g}$ ) | 3.384                             | 3.251                             |
| $S_6$ ( ${}^1T_{2g}$ ) | 3.384                             | 3.251                             |
| $T_1$ ( ${}^3T_{1g}$ ) | 1.624                             | 1.280                             |
| $T_2$ ( ${}^3T_{1g}$ ) | 1.624                             | 1.280                             |
| $T_3$ ( ${}^3T_{1g}$ ) | 1.624                             | 1.280                             |
| $T_4$ ( ${}^3T_{2g}$ ) | 1.812                             | 1.812                             |
| $T_5$ ( ${}^3T_{2g}$ ) | 1.812                             | 1.876                             |
| $T_6$ ( ${}^3T_{2g}$ ) | 1.812                             | 1.876                             |
| $Q_1$ ( ${}^5T_{2g}$ ) | 1.577                             | 1.333                             |
| $Q_2$ ( ${}^5T_{2g}$ ) | 1.647                             | 1.333                             |
| $Q_3$ ( ${}^5T_{2g}$ ) | 1.647                             | 1.333                             |

**Table S3:** First-order diagonal coefficients  $\kappa_i^{(\alpha)}$  for VCHAM-B3LYP\*, given in eV. Both FC adiabatic and diabatic state labels, the latter in parantheses, are given. Note that the S<sub>4</sub>–S<sub>6</sub> (<sup>1</sup>T<sub>2g</sub>) states were not used in the QD simulations but are reported here for completeness.

| State                                           | $\kappa_{13}^{(\alpha)}$ | $\kappa_{14}^{(\alpha)}$ | $\kappa_{15}^{(\alpha)}$ |
|-------------------------------------------------|--------------------------|--------------------------|--------------------------|
| S <sub>0</sub> ( <sup>1</sup> GS)               | 0.023                    | 0.031                    | 0.010                    |
| S <sub>1</sub> ( <sup>1</sup> T <sub>1g</sub> ) | 0.080                    | 0.103                    | 0.145                    |
| S <sub>2</sub> ( <sup>1</sup> T <sub>1g</sub> ) | 0.023                    | −0.032                   | 0.145                    |
| S <sub>3</sub> ( <sup>1</sup> T <sub>1g</sub> ) | −0.040                   | 0.015                    | 0.145                    |
| S <sub>4</sub> ( <sup>1</sup> T <sub>2g</sub> ) | −0.030                   | −0.040                   | N/A                      |
| S <sub>5</sub> ( <sup>1</sup> T <sub>2g</sub> ) | 0.019                    | 0.004                    | N/A                      |
| S <sub>6</sub> ( <sup>1</sup> T <sub>2g</sub> ) | 0.073                    | 0.105                    | N/A                      |
| T <sub>1</sub> ( <sup>3</sup> T <sub>1g</sub> ) | 0.055                    | 0.070                    | 0.154                    |
| T <sub>2</sub> ( <sup>3</sup> T <sub>1g</sub> ) | 0.069                    | 0.077                    | 0.154                    |
| T <sub>3</sub> ( <sup>3</sup> T <sub>1g</sub> ) | −0.046                   | −0.056                   | 0.154                    |
| T <sub>4</sub> ( <sup>3</sup> T <sub>2g</sub> ) | −0.010                   | −0.011                   | 0.146                    |
| T <sub>5</sub> ( <sup>3</sup> T <sub>2g</sub> ) | −0.028                   | −0.029                   | 0.146                    |
| T <sub>6</sub> ( <sup>3</sup> T <sub>2g</sub> ) | 0.081                    | 0.096                    | 0.146                    |
| Q <sub>1</sub> ( <sup>5</sup> T <sub>2g</sub> ) | 0.013                    | 0.031                    | 0.322                    |
| Q <sub>2</sub> ( <sup>5</sup> T <sub>2g</sub> ) | 0.020                    | 0.011                    | 0.331                    |
| Q <sub>3</sub> ( <sup>5</sup> T <sub>2g</sub> ) | 0.018                    | 0.017                    | 0.325                    |

**Table S4:** Second-order diagonal coefficients  $\gamma_i^{(\alpha)}$  for VCHAM-B3LYP\*, given in eV. Both FC adiabatic and diabatic state labels, the latter in parantheses, are given. Note that the S<sub>4</sub>–S<sub>6</sub> (<sup>1</sup>T<sub>2g</sub>) states were not used in the QD simulations but are reported here for completeness.

| State                                           | $\gamma_{13}^{(\alpha)}$ | $\gamma_{14}^{(\alpha)}$ | $\gamma_{15}^{(\alpha)}$ |
|-------------------------------------------------|--------------------------|--------------------------|--------------------------|
| S <sub>0</sub> ( <sup>1</sup> GS)               | 0.007                    | 0.005                    | −0.013                   |
| S <sub>1</sub> ( <sup>1</sup> T <sub>1g</sub> ) | 0.010                    | 0.008                    | −0.011                   |
| S <sub>2</sub> ( <sup>1</sup> T <sub>1g</sub> ) | 0.011                    | 0.018                    | −0.011                   |
| S <sub>3</sub> ( <sup>1</sup> T <sub>1g</sub> ) | 0.021                    | 0.011                    | −0.011                   |
| S <sub>4</sub> ( <sup>1</sup> T <sub>2g</sub> ) | 0.013                    | 0.013                    | N/A                      |
| S <sub>5</sub> ( <sup>1</sup> T <sub>2g</sub> ) | 0.009                    | 0.009                    | N/A                      |
| S <sub>6</sub> ( <sup>1</sup> T <sub>2g</sub> ) | 0.002                    | 0.000                    | N/A                      |
| T <sub>1</sub> ( <sup>3</sup> T <sub>1g</sub> ) | 0.010                    | 0.006                    | −0.011                   |
| T <sub>2</sub> ( <sup>3</sup> T <sub>1g</sub> ) | 0.010                    | 0.006                    | −0.011                   |
| T <sub>3</sub> ( <sup>3</sup> T <sub>1g</sub> ) | 0.020                    | 0.021                    | −0.011                   |
| T <sub>4</sub> ( <sup>3</sup> T <sub>2g</sub> ) | 0.017                    | 0.017                    | −0.011                   |
| T <sub>5</sub> ( <sup>3</sup> T <sub>2g</sub> ) | 0.017                    | 0.018                    | −0.011                   |
| T <sub>6</sub> ( <sup>3</sup> T <sub>2g</sub> ) | 0.007                    | 0.004                    | −0.011                   |
| Q <sub>1</sub> ( <sup>5</sup> T <sub>2g</sub> ) | 0.019                    | 0.018                    | −0.008                   |
| Q <sub>2</sub> ( <sup>5</sup> T <sub>2g</sub> ) | 0.022                    | 0.021                    | −0.006                   |
| Q <sub>3</sub> ( <sup>5</sup> T <sub>2g</sub> ) | 0.020                    | 0.019                    | −0.006                   |

**Table S5:** First-order off-diagonal coefficients  $\lambda_i^{(\alpha\beta)}$  for VCHAM-B3LYP\*, given in eV. Both FC adiabatic and diabatic state labels, the latter in parantheses, are given. Note that the S<sub>4</sub>–S<sub>6</sub> (<sup>1</sup>T<sub>2g</sub>) states were not used in the QD simulations but are reported here for completeness.

| State                                                                                             | $\lambda_{13}^{(\alpha\beta)}$ | $\lambda_{14}^{(\alpha\beta)}$ | $\lambda_{15}^{(\alpha\beta)}$ |
|---------------------------------------------------------------------------------------------------|--------------------------------|--------------------------------|--------------------------------|
| S <sub>1</sub> ( <sup>1</sup> T <sub>1g</sub> ) - S <sub>2</sub> ( <sup>1</sup> T <sub>1g</sub> ) | -0.040                         | -0.032                         | 0.000                          |
| S <sub>1</sub> ( <sup>1</sup> T <sub>1g</sub> ) - S <sub>3</sub> ( <sup>1</sup> T <sub>1g</sub> ) | 0.064                          | 0.007                          | 0.000                          |
| S <sub>1</sub> ( <sup>1</sup> T <sub>1g</sub> ) - S <sub>4</sub> ( <sup>1</sup> T <sub>2g</sub> ) | 0.082                          | 0.080                          | 0.000                          |
| S <sub>1</sub> ( <sup>1</sup> T <sub>1g</sub> ) - S <sub>5</sub> ( <sup>1</sup> T <sub>2g</sub> ) | 0.000                          | 0.000                          | 0.000                          |
| S <sub>1</sub> ( <sup>1</sup> T <sub>1g</sub> ) - S <sub>6</sub> ( <sup>1</sup> T <sub>2g</sub> ) | 0.000                          | 0.000                          | 0.000                          |
| S <sub>2</sub> ( <sup>1</sup> T <sub>1g</sub> ) - S <sub>3</sub> ( <sup>1</sup> T <sub>1g</sub> ) | 0.050                          | 0.079                          | 0.000                          |
| S <sub>2</sub> ( <sup>1</sup> T <sub>1g</sub> ) - S <sub>4</sub> ( <sup>1</sup> T <sub>2g</sub> ) | 0.000                          | 0.000                          | 0.000                          |
| S <sub>2</sub> ( <sup>1</sup> T <sub>1g</sub> ) - S <sub>5</sub> ( <sup>1</sup> T <sub>2g</sub> ) | 0.073                          | 0.078                          | 0.000                          |
| S <sub>2</sub> ( <sup>1</sup> T <sub>1g</sub> ) - S <sub>6</sub> ( <sup>1</sup> T <sub>2g</sub> ) | 0.000                          | 0.000                          | 0.000                          |
| S <sub>3</sub> ( <sup>1</sup> T <sub>1g</sub> ) - S <sub>4</sub> ( <sup>1</sup> T <sub>2g</sub> ) | 0.000                          | 0.000                          | 0.000                          |
| S <sub>3</sub> ( <sup>1</sup> T <sub>1g</sub> ) - S <sub>5</sub> ( <sup>1</sup> T <sub>2g</sub> ) | 0.073                          | 0.091                          | 0.000                          |
| S <sub>3</sub> ( <sup>1</sup> T <sub>1g</sub> ) - S <sub>6</sub> ( <sup>1</sup> T <sub>2g</sub> ) | -0.038                         | -0.011                         | 0.000                          |
| S <sub>4</sub> ( <sup>1</sup> T <sub>2g</sub> ) - S <sub>5</sub> ( <sup>1</sup> T <sub>2g</sub> ) | 0.025                          | 0.020                          | 0.000                          |
| S <sub>4</sub> ( <sup>1</sup> T <sub>2g</sub> ) - S <sub>6</sub> ( <sup>1</sup> T <sub>2g</sub> ) | 0.074                          | 0.044                          | 0.000                          |
| S <sub>5</sub> ( <sup>1</sup> T <sub>2g</sub> ) - S <sub>6</sub> ( <sup>1</sup> T <sub>2g</sub> ) | 0.045                          | 0.050                          | 0.000                          |
| T <sub>1</sub> ( <sup>3</sup> T <sub>1g</sub> ) - T <sub>2</sub> ( <sup>3</sup> T <sub>1g</sub> ) | 0.008                          | -0.008                         | 0.000                          |
| T <sub>1</sub> ( <sup>3</sup> T <sub>1g</sub> ) - T <sub>3</sub> ( <sup>3</sup> T <sub>1g</sub> ) | 0.018                          | -0.029                         | 0.000                          |
| T <sub>1</sub> ( <sup>3</sup> T <sub>1g</sub> ) - T <sub>4</sub> ( <sup>3</sup> T <sub>2g</sub> ) | 0.121                          | 0.115                          | 0.000                          |
| T <sub>1</sub> ( <sup>3</sup> T <sub>1g</sub> ) - T <sub>5</sub> ( <sup>3</sup> T <sub>2g</sub> ) | 0.000                          | 0.000                          | 0.000                          |
| T <sub>1</sub> ( <sup>3</sup> T <sub>1g</sub> ) - T <sub>6</sub> ( <sup>3</sup> T <sub>2g</sub> ) | 0.000                          | 0.000                          | 0.000                          |
| T <sub>2</sub> ( <sup>3</sup> T <sub>1g</sub> ) - T <sub>3</sub> ( <sup>3</sup> T <sub>1g</sub> ) | -0.098                         | -0.079                         | 0.000                          |
| T <sub>2</sub> ( <sup>3</sup> T <sub>1g</sub> ) - T <sub>4</sub> ( <sup>3</sup> T <sub>2g</sub> ) | 0.000                          | 0.000                          | 0.000                          |
| T <sub>2</sub> ( <sup>3</sup> T <sub>1g</sub> ) - T <sub>5</sub> ( <sup>3</sup> T <sub>2g</sub> ) | 0.074                          | 0.085                          | 0.000                          |
| T <sub>2</sub> ( <sup>3</sup> T <sub>1g</sub> ) - T <sub>6</sub> ( <sup>3</sup> T <sub>2g</sub> ) | 0.000                          | 0.000                          | 0.000                          |
| T <sub>3</sub> ( <sup>3</sup> T <sub>1g</sub> ) - T <sub>4</sub> ( <sup>3</sup> T <sub>2g</sub> ) | 0.000                          | 0.000                          | 0.000                          |
| T <sub>3</sub> ( <sup>3</sup> T <sub>1g</sub> ) - T <sub>5</sub> ( <sup>3</sup> T <sub>2g</sub> ) | -0.017                         | -0.017                         | 0.000                          |
| T <sub>3</sub> ( <sup>3</sup> T <sub>1g</sub> ) - T <sub>6</sub> ( <sup>3</sup> T <sub>2g</sub> ) | 0.054                          | 0.054                          | 0.000                          |
| T <sub>4</sub> ( <sup>3</sup> T <sub>2g</sub> ) - T <sub>5</sub> ( <sup>3</sup> T <sub>2g</sub> ) | -0.010                         | 0.010                          | 0.000                          |
| T <sub>4</sub> ( <sup>3</sup> T <sub>2g</sub> ) - T <sub>6</sub> ( <sup>3</sup> T <sub>2g</sub> ) | -0.016                         | 0.022                          | 0.000                          |
| T <sub>5</sub> ( <sup>3</sup> T <sub>2g</sub> ) - T <sub>6</sub> ( <sup>3</sup> T <sub>2g</sub> ) | 0.087                          | 0.072                          | 0.000                          |
| Q <sub>1</sub> ( <sup>5</sup> T <sub>2g</sub> ) - Q <sub>2</sub> ( <sup>5</sup> T <sub>2g</sub> ) | -0.001                         | 0.013                          | 0.000                          |
| Q <sub>1</sub> ( <sup>5</sup> T <sub>2g</sub> ) - Q <sub>3</sub> ( <sup>5</sup> T <sub>2g</sub> ) | 0.001                          | 0.013                          | 0.000                          |
| Q <sub>2</sub> ( <sup>5</sup> T <sub>2g</sub> ) - Q <sub>3</sub> ( <sup>5</sup> T <sub>2g</sub> ) | 0.013                          | 0.000                          | 0.000                          |

**Table S6:** First-order diagonal coefficients  $\kappa_i^{(\alpha)}$  for LVC-B3LYP\* ( $\geq 0.001$  eV) singlet states, given in eV.

| Mode       | $\kappa_i^{(S_0,GS)}$ | $\kappa_i^{(S_1,{}^1T_{1g})}$ | $\kappa_i^{(S_2,{}^1T_{1g})}$ | $\kappa_i^{(S_3,{}^1T_{1g})}$ |
|------------|-----------------------|-------------------------------|-------------------------------|-------------------------------|
| $\nu_4$    | 0.000                 | 0.000                         | 0.000                         | 0.001                         |
| $\nu_6$    | 0.000                 | 0.000                         | 0.000                         | 0.002                         |
| $\nu_{13}$ | 0.000                 | 0.000                         | 0.000                         | 0.064                         |
| $\nu_{14}$ | 0.000                 | 0.033                         | 0.000                         | 0.001                         |
| $\nu_{15}$ | 0.030                 | 0.201                         | 0.201                         | 0.201                         |
| $\nu_{16}$ | 0.000                 | 0.000                         | 0.000                         | 0.001                         |
| $\nu_{20}$ | 0.000                 | 0.000                         | 0.001                         | 0.000                         |
| $\nu_{23}$ | 0.000                 | 0.006                         | 0.000                         | 0.000                         |
| $\nu_{24}$ | 0.000                 | 0.002                         | 0.000                         | 0.000                         |
| $\nu_{40}$ | 0.000                 | 0.006                         | 0.000                         | 0.000                         |
| $\nu_{41}$ | 0.000                 | 0.000                         | 0.000                         | 0.013                         |
| $\nu_{46}$ | 0.003                 | 0.000                         | 0.003                         | 0.004                         |



**Table S7:** First-order diagonal coefficients  $\kappa_i^{(\alpha)}$  for LVC-B3LYP\* ( $\geq 0.001$  eV) triplet states, given in eV.

| Mode       | $\kappa_i^{(T_1, ^3T_{1g})}$ | $\kappa_i^{(T_2, ^3T_{1g})}$ | $\kappa_i^{(T_3, ^3T_{1g})}$ | $\kappa_i^{(T_4, ^3T_{2g})}$ | $\kappa_i^{(T_5, ^3T_{2g})}$ | $\kappa_i^{(T_6, ^3T_{2g})}$ |
|------------|------------------------------|------------------------------|------------------------------|------------------------------|------------------------------|------------------------------|
| $\nu_4$    | 0.000                        | 0.000                        | 0.000                        | 0.000                        | 0.000                        | 0.001                        |
| $\nu_6$    | 0.000                        | 0.000                        | 0.002                        | 0.000                        | 0.000                        | 0.003                        |
| $\nu_{13}$ | 0.000                        | 0.000                        | 0.069                        | 0.000                        | 0.000                        | 0.072                        |
| $\nu_{14}$ | 0.027                        | 0.000                        | 0.000                        | 0.000                        | 0.007                        | 0.000                        |
| $\nu_{15}$ | 0.214                        | 0.214                        | 0.214                        | 0.209                        | 0.209                        | 0.209                        |
| $\nu_{16}$ | 0.000                        | 0.000                        | 0.002                        | 0.000                        | 0.000                        | 0.000                        |
| $\nu_{19}$ | 0.000                        | 0.001                        | 0.000                        | 0.001                        | 0.000                        | 0.000                        |
| $\nu_{20}$ | 0.000                        | 0.000                        | 0.000                        | 0.002                        | 0.000                        | 0.000                        |
| $\nu_{22}$ | 0.000                        | 0.000                        | 0.000                        | 0.001                        | 0.000                        | 0.000                        |
| $\nu_{23}$ | 0.006                        | 0.000                        | 0.000                        | 0.007                        | 0.000                        | 0.000                        |
| $\nu_{24}$ | 0.003                        | 0.000                        | 0.000                        | 0.003                        | 0.000                        | 0.000                        |
| $\nu_{37}$ | 0.000                        | 0.000                        | 0.000                        | 0.000                        | 0.002                        | 0.000                        |
| $\nu_{40}$ | 0.006                        | 0.000                        | 0.000                        | 0.000                        | 0.002                        | 0.000                        |
| $\nu_{41}$ | 0.000                        | 0.000                        | 0.016                        | 0.000                        | 0.000                        | 0.011                        |
| $\nu_{46}$ | 0.000                        | 0.004                        | 0.006                        | 0.007                        | 0.003                        | 0.000                        |
| $\nu_{50}$ | 0.000                        | 0.000                        | 0.000                        | 0.002                        | 0.001                        | 0.002                        |

**Table S8:** First-order diagonal coefficients  $\kappa_i^{(\alpha)}$  for LVC-B3LYP\* ( $\geq 0.001$  eV) quintet states, given in eV.

| Mode       | $\kappa_i^{(Q_1, ^5T_{2g})}$ | $\kappa_i^{(Q_2, ^5T_{2g})}$ | $\kappa_i^{(Q_3, ^5T_{2g})}$ |
|------------|------------------------------|------------------------------|------------------------------|
| $\nu_4$    | 0.000                        | 0.000                        | 0.004                        |
| $\nu_{13}$ | 0.006                        | 0.000                        | 0.008                        |
| $\nu_{14}$ | 0.006                        | 0.000                        | 0.007                        |
| $\nu_{15}$ | 0.389                        | 0.389                        | 0.391                        |
| $\nu_{16}$ | 0.000                        | 0.000                        | 0.000                        |
| $\nu_{24}$ | 0.000                        | 0.010                        | 0.002                        |
| $\nu_{39}$ | 0.000                        | 0.000                        | 0.003                        |
| $\nu_{40}$ | 0.004                        | 0.000                        | 0.005                        |
| $\nu_{41}$ | 0.004                        | 0.000                        | 0.006                        |
| $\nu_{46}$ | 0.004                        | 0.000                        | 0.004                        |
| $\nu_{47}$ | 0.003                        | 0.000                        | 0.004                        |
| $\nu_{50}$ | 0.000                        | 0.002                        | 0.000                        |
| $\nu_{51}$ | 0.014                        | 0.014                        | 0.014                        |

First-order off-diagonal coefficients  $\lambda_i^{(\alpha\beta)}$  for LVC-B3LYP\* ( $\geq 0.001$  eV) singlet states:

$$\begin{aligned}
i = \nu_{13}, \alpha = S_2 (^1T_{1g}), \beta = S_4 (^1T_{1g}): & 0.004 \text{ eV} \\
i = \nu_{14}, \alpha = S_2 (^1T_{1g}), \beta = S_3 (^1T_{1g}): & 0.017 \text{ eV} \\
i = \nu_{14}, \alpha = S_3 (^1T_{1g}), \beta = S_4 (^1T_{1g}): & 0.013 \text{ eV} \\
i = \nu_{16}, \alpha = S_3 (^1T_{1g}), \beta = S_4 (^1T_{1g}): & 0.001 \text{ eV} \\
i = \nu_{22}, \alpha = S_2 (^1T_{1g}), \beta = S_3 (^1T_{1g}): & 0.004 \text{ eV} \\
i = \nu_{22}, \alpha = S_2 (^1T_{1g}), \beta = S_4 (^1T_{1g}): & 0.005 \text{ eV} \\
i = \nu_{22}, \alpha = S_3 (^1T_{1g}), \beta = S_4 (^1T_{1g}): & 0.001 \text{ eV} \\
i = \nu_{23}, \alpha = S_2 (^1T_{1g}), \beta = S_4 (^1T_{1g}): & 0.003 \text{ eV} \\
i = \nu_{23}, \alpha = S_3 (^1T_{1g}), \beta = S_4 (^1T_{1g}): & 0.002 \text{ eV} \\
i = \nu_{39}, \alpha = S_2 (^1T_{1g}), \beta = S_3 (^1T_{1g}): & 0.001 \text{ eV} \\
i = \nu_{40}, \alpha = S_2 (^1T_{1g}), \beta = S_4 (^1T_{1g}): & 0.009 \text{ eV} \\
i = \nu_{47}, \alpha = S_2 (^1T_{1g}), \beta = S_4 (^1T_{1g}): & 0.001 \text{ eV}
\end{aligned}$$

First-order off-diagonal coefficients  $\lambda_i^{(\alpha\beta)}$  for LVC-B3LYP\* ( $\geq 0.001$  eV) triplet states:

$$\begin{aligned}
i = \nu_1, \alpha = T_1 (^3T_{1g}), \beta = T_4 (^3T_{2g}): & 0.002 \text{ eV} \\
i = \nu_2, \alpha = T_2 (^3T_{1g}), \beta = T_4 (^3T_{2g}): & 0.002 \text{ eV} \\
i = \nu_2, \alpha = T_3 (^3T_{1g}), \beta = T_4 (^3T_{2g}): & 0.005 \text{ eV} \\
i = \nu_3, \alpha = T_1 (^3T_{1g}), \beta = T_6 (^3T_{2g}): & 0.001 \text{ eV} \\
i = \nu_4, \alpha = T_1 (^3T_{1g}), \beta = T_4 (^3T_{2g}): & 0.001 \text{ eV} \\
i = \nu_4, \alpha = T_1 (^3T_{1g}), \beta = T_5 (^3T_{2g}): & 0.002 \text{ eV} \\
i = \nu_4, \alpha = T_2 (^3T_{1g}), \beta = T_6 (^3T_{2g}): & 0.006 \text{ eV} \\
i = \nu_4, \alpha = T_3 (^3T_{1g}), \beta = T_4 (^3T_{2g}): & 0.011 \text{ eV} \\
i = \nu_4, \alpha = T_4 (^3T_{2g}), \beta = T_6 (^3T_{2g}): & 0.003 \text{ eV} \\
i = \nu_4, \alpha = T_5 (^3T_{2g}), \beta = T_6 (^3T_{2g}): & 0.002 \text{ eV} \\
i = \nu_5, \alpha = T_1 (^3T_{1g}), \beta = T_4 (^3T_{2g}): & 0.005 \text{ eV} \\
i = \nu_5, \alpha = T_1 (^3T_{1g}), \beta = T_6 (^3T_{2g}): & 0.002 \text{ eV} \\
i = \nu_5, \alpha = T_2 (^3T_{1g}), \beta = T_6 (^3T_{2g}): & 0.002 \text{ eV} \\
i = \nu_5, \alpha = T_3 (^3T_{1g}), \beta = T_4 (^3T_{2g}): & 0.002 \text{ eV} \\
i = \nu_5, \alpha = T_3 (^3T_{1g}), \beta = T_6 (^3T_{2g}): & 0.006 \text{ eV} \\
i = \nu_5, \alpha = T_5 (^3T_{2g}), \beta = T_6 (^3T_{2g}): & 0.002 \text{ eV} \\
i = \nu_6, \alpha = T_1 (^3T_{1g}), \beta = T_3 (^3T_{1g}): & 0.001 \text{ eV} \\
i = \nu_6, \alpha = T_1 (^3T_{1g}), \beta = T_5 (^3T_{2g}): & 0.003 \text{ eV} \\
i = \nu_6, \alpha = T_1 (^3T_{1g}), \beta = T_6 (^3T_{2g}): & 0.002 \text{ eV} \\
i = \nu_6, \alpha = T_3 (^3T_{1g}), \beta = T_4 (^3T_{2g}): & 0.002 \text{ eV}
\end{aligned}$$

$i = \nu_6, \alpha = T_3 (^3T_{1g}, \beta = T_5 (^3T_{2g})): 0.007 \text{ eV}$   
 $i = \nu_6, \alpha = T_3 (^3T_{1g}, \beta = T_6 (^3T_{2g})): 0.004 \text{ eV}$   
 $i = \nu_7, \alpha = T_1 (^3T_{1g}, \beta = T_5 (^3T_{2g})): 0.001 \text{ eV}$   
 $i = \nu_8, \alpha = T_1 (^3T_{1g}, \beta = T_4 (^3T_{2g})): 0.002 \text{ eV}$   
 $i = \nu_9, \alpha = T_2 (^3T_{1g}, \beta = T_6 (^3T_{2g})): 0.003 \text{ eV}$   
 $i = \nu_{10}, \alpha = T_1 (^3T_{1g}, \beta = T_5 (^3T_{2g})): 0.006 \text{ eV}$   
 $i = \nu_{10}, \alpha = T_2 (^3T_{1g}, \beta = T_4 (^3T_{2g})): 0.005 \text{ eV}$   
 $i = \nu_{10}, \alpha = T_2 (^3T_{1g}, \beta = T_5 (^3T_{2g})): 0.002 \text{ eV}$   
 $i = \nu_{10}, \alpha = T_3 (^3T_{1g}, \beta = T_5 (^3T_{2g})): 0.005 \text{ eV}$   
 $i = \nu_{11}, \alpha = T_2 (^3T_{1g}, \beta = T_4 (^3T_{2g})): 0.008 \text{ eV}$   
 $i = \nu_{11}, \alpha = T_3 (^3T_{1g}, \beta = T_5 (^3T_{2g})): 0.008 \text{ eV}$   
 $i = \nu_{11}, \alpha = T_3 (^3T_{1g}, \beta = T_6 (^3T_{2g})): 0.001 \text{ eV}$   
 $i = \nu_{12}, \alpha = T_1 (^3T_{1g}, \beta = T_4 (^3T_{2g})): 0.002 \text{ eV}$   
 $i = \nu_{12}, \alpha = T_3 (^3T_{1g}, \beta = T_6 (^3T_{2g})): 0.003 \text{ eV}$   
 $i = \nu_{13}, \alpha = T_1 (^3T_{1g}, \beta = T_2 (^3T_{1g})): 0.051 \text{ eV}$   
 $i = \nu_{13}, \alpha = T_1 (^3T_{1g}, \beta = T_3 (^3T_{1g})): 0.007 \text{ eV}$   
 $i = \nu_{13}, \alpha = T_1 (^3T_{1g}, \beta = T_5 (^3T_{2g})): 0.009 \text{ eV}$   
 $i = \nu_{13}, \alpha = T_1 (^3T_{1g}, \beta = T_6 (^3T_{2g})): 0.013 \text{ eV}$   
 $i = \nu_{13}, \alpha = T_2 (^3T_{1g}, \beta = T_3 (^3T_{1g})): 0.003 \text{ eV}$   
 $i = \nu_{13}, \alpha = T_2 (^3T_{1g}, \beta = T_4 (^3T_{2g})): 0.001 \text{ eV}$   
 $i = \nu_{13}, \alpha = T_2 (^3T_{1g}, \beta = T_5 (^3T_{2g})): 0.095 \text{ eV}$   
 $i = \nu_{13}, \alpha = T_2 (^3T_{1g}, \beta = T_6 (^3T_{2g})): 0.017 \text{ eV}$   
 $i = \nu_{13}, \alpha = T_3 (^3T_{1g}, \beta = T_6 (^3T_{2g})): 0.004 \text{ eV}$   
 $i = \nu_{13}, \alpha = T_4 (^3T_{2g}, \beta = T_5 (^3T_{2g})): 0.026 \text{ eV}$   
 $i = \nu_{14}, \alpha = T_1 (^3T_{1g}, \beta = T_3 (^3T_{1g})): 0.055 \text{ eV}$   
 $i = \nu_{14}, \alpha = T_1 (^3T_{1g}, \beta = T_6 (^3T_{2g})): 0.063 \text{ eV}$   
 $i = \nu_{14}, \alpha = T_2 (^3T_{1g}, \beta = T_3 (^3T_{1g})): 0.012 \text{ eV}$   
 $i = \nu_{14}, \alpha = T_2 (^3T_{1g}, \beta = T_4 (^3T_{2g})): 0.002 \text{ eV}$   
 $i = \nu_{14}, \alpha = T_2 (^3T_{1g}, \beta = T_6 (^3T_{2g})): 0.003 \text{ eV}$   
 $i = \nu_{14}, \alpha = T_3 (^3T_{1g}, \beta = T_4 (^3T_{2g})): 0.072 \text{ eV}$   
 $i = \nu_{14}, \alpha = T_3 (^3T_{1g}, \beta = T_5 (^3T_{2g})): 0.002 \text{ eV}$   
 $i = \nu_{14}, \alpha = T_3 (^3T_{1g}, \beta = T_6 (^3T_{2g})): 0.001 \text{ eV}$   
 $i = \nu_{14}, \alpha = T_4 (^3T_{2g}, \beta = T_6 (^3T_{2g})): 0.057 \text{ eV}$   
 $i = \nu_{15}, \alpha = T_2 (^3T_{1g}, \beta = T_4 (^3T_{2g})): 0.005 \text{ eV}$   
 $i = \nu_{15}, \alpha = T_2 (^3T_{1g}, \beta = T_5 (^3T_{2g})): 0.006 \text{ eV}$   
 $i = \nu_{15}, \alpha = T_2 (^3T_{1g}, \beta = T_6 (^3T_{2g})): 0.005 \text{ eV}$

$i = \nu_{15}, \alpha = T_3 (^3T_{1g}, \beta = T_4 (^3T_{2g}): 0.002 \text{ eV}$   
 $i = \nu_{15}, \alpha = T_3 (^3T_{1g}, \beta = T_5 (^3T_{2g}): 0.003 \text{ eV}$   
 $i = \nu_{15}, \alpha = T_3 (^3T_{1g}, \beta = T_6 (^3T_{2g}): 0.003 \text{ eV}$   
 $i = \nu_{16}, \alpha = T_2 (^3T_{1g}, \beta = T_5 (^3T_{2g}): 0.002 \text{ eV}$   
 $i = \nu_{16}, \alpha = T_2 (^3T_{1g}, \beta = T_6 (^3T_{2g}): 0.005 \text{ eV}$   
 $i = \nu_{17}, \alpha = T_2 (^3T_{1g}, \beta = T_6 (^3T_{2g}): 0.007 \text{ eV}$   
 $i = \nu_{18}, \alpha = T_1 (^3T_{1g}, \beta = T_4 (^3T_{2g}): 0.005 \text{ eV}$   
 $i = \nu_{18}, \alpha = T_3 (^3T_{1g}, \beta = T_5 (^3T_{2g}): 0.005 \text{ eV}$   
 $i = \nu_{19}, \alpha = T_1 (^3T_{1g}, \beta = T_4 (^3T_{2g}): 0.003 \text{ eV}$   
 $i = \nu_{19}, \alpha = T_3 (^3T_{1g}, \beta = T_4 (^3T_{2g}): 0.002 \text{ eV}$   
 $i = \nu_{19}, \alpha = T_3 (^3T_{1g}, \beta = T_5 (^3T_{2g}): 0.001 \text{ eV}$   
 $i = \nu_{19}, \alpha = T_4 (^3T_{2g}, \beta = T_5 (^3T_{2g}): 0.001 \text{ eV}$   
 $i = \nu_{20}, \alpha = T_1 (^3T_{1g}, \beta = T_5 (^3T_{2g}): 0.006 \text{ eV}$   
 $i = \nu_{20}, \alpha = T_2 (^3T_{1g}, \beta = T_4 (^3T_{2g}): 0.003 \text{ eV}$   
 $i = \nu_{20}, \alpha = T_3 (^3T_{1g}, \beta = T_4 (^3T_{2g}): 0.005 \text{ eV}$   
 $i = \nu_{20}, \alpha = T_3 (^3T_{1g}, \beta = T_5 (^3T_{2g}): 0.004 \text{ eV}$   
 $i = \nu_{21}, \alpha = T_1 (^3T_{1g}, \beta = T_4 (^3T_{2g}): 0.006 \text{ eV}$   
 $i = \nu_{21}, \alpha = T_2 (^3T_{1g}, \beta = T_5 (^3T_{2g}): 0.004 \text{ eV}$   
 $i = \nu_{21}, \alpha = T_3 (^3T_{1g}, \beta = T_4 (^3T_{2g}): 0.005 \text{ eV}$   
 $i = \nu_{22}, \alpha = T_1 (^3T_{1g}, \beta = T_4 (^3T_{2g}): 0.006 \text{ eV}$   
 $i = \nu_{22}, \alpha = T_3 (^3T_{1g}, \beta = T_4 (^3T_{2g}): 0.002 \text{ eV}$   
 $i = \nu_{23}, \alpha = T_1 (^3T_{1g}, \beta = T_2 (^3T_{1g}): 0.002 \text{ eV}$   
 $i = \nu_{23}, \alpha = T_2 (^3T_{1g}, \beta = T_5 (^3T_{2g}): 0.006 \text{ eV}$   
 $i = \nu_{23}, \alpha = T_2 (^3T_{1g}, \beta = T_6 (^3T_{2g}): 0.003 \text{ eV}$   
 $i = \nu_{23}, \alpha = T_3 (^3T_{1g}, \beta = T_5 (^3T_{2g}): 0.002 \text{ eV}$   
 $i = \nu_{23}, \alpha = T_3 (^3T_{1g}, \beta = T_6 (^3T_{2g}): 0.004 \text{ eV}$   
 $i = \nu_{23}, \alpha = T_4 (^3T_{2g}, \beta = T_5 (^3T_{2g}): 0.002 \text{ eV}$   
 $i = \nu_{23}, \alpha = T_5 (^3T_{2g}, \beta = T_6 (^3T_{2g}): 0.002 \text{ eV}$   
 $i = \nu_{24}, \alpha = T_1 (^3T_{1g}, \beta = T_6 (^3T_{2g}): 0.014 \text{ eV}$   
 $i = \nu_{24}, \alpha = T_3 (^3T_{1g}, \beta = T_5 (^3T_{2g}): 0.007 \text{ eV}$   
 $i = \nu_{24}, \alpha = T_5 (^3T_{2g}, \beta = T_6 (^3T_{2g}): 0.005 \text{ eV}$   
 $i = \nu_{25}, \alpha = T_1 (^3T_{1g}, \beta = T_5 (^3T_{2g}): 0.005 \text{ eV}$   
 $i = \nu_{25}, \alpha = T_2 (^3T_{1g}, \beta = T_5 (^3T_{2g}): 0.003 \text{ eV}$   
 $i = \nu_{26}, \alpha = T_2 (^3T_{1g}, \beta = T_6 (^3T_{2g}): 0.001 \text{ eV}$   
 $i = \nu_{28}, \alpha = T_2 (^3T_{1g}, \beta = T_4 (^3T_{2g}): 0.005 \text{ eV}$   
 $i = \nu_{29}, \alpha = T_1 (^3T_{1g}, \beta = T_5 (^3T_{2g}): 0.019 \text{ eV}$

$i = \nu_{29}, \alpha = T_2 ({}^3T_{1g}, \beta = T_4 ({}^3T_{2g}): 0.015 \text{ eV}$   
 $i = \nu_{29}, \alpha = T_2 ({}^3T_{1g}, \beta = T_5 ({}^3T_{2g}): 0.001 \text{ eV}$   
 $i = \nu_{29}, \alpha = T_2 ({}^3T_{1g}, \beta = T_6 ({}^3T_{2g}): 0.008 \text{ eV}$   
 $i = \nu_{30}, \alpha = T_1 ({}^3T_{1g}, \beta = T_4 ({}^3T_{2g}): 0.005 \text{ eV}$   
 $i = \nu_{30}, \alpha = T_1 ({}^3T_{1g}, \beta = T_5 ({}^3T_{2g}): 0.012 \text{ eV}$   
 $i = \nu_{30}, \alpha = T_1 ({}^3T_{1g}, \beta = T_6 ({}^3T_{2g}): 0.001 \text{ eV}$   
 $i = \nu_{30}, \alpha = T_2 ({}^3T_{1g}, \beta = T_5 ({}^3T_{2g}): 0.001 \text{ eV}$   
 $i = \nu_{30}, \alpha = T_3 ({}^3T_{1g}, \beta = T_4 ({}^3T_{2g}): 0.004 \text{ eV}$   
 $i = \nu_{31}, \alpha = T_2 ({}^3T_{1g}, \beta = T_4 ({}^3T_{2g}): 0.005 \text{ eV}$   
 $i = \nu_{31}, \alpha = T_2 ({}^3T_{1g}, \beta = T_6 ({}^3T_{2g}): 0.002 \text{ eV}$   
 $i = \nu_{32}, \alpha = T_1 ({}^3T_{1g}, \beta = T_4 ({}^3T_{2g}): 0.006 \text{ eV}$   
 $i = \nu_{32}, \alpha = T_1 ({}^3T_{1g}, \beta = T_6 ({}^3T_{2g}): 0.004 \text{ eV}$   
 $i = \nu_{32}, \alpha = T_2 ({}^3T_{1g}, \beta = T_6 ({}^3T_{2g}): 0.002 \text{ eV}$   
 $i = \nu_{32}, \alpha = T_3 ({}^3T_{1g}, \beta = T_4 ({}^3T_{2g}): 0.002 \text{ eV}$   
 $i = \nu_{33}, \alpha = T_1 ({}^3T_{1g}, \beta = T_5 ({}^3T_{2g}): 0.002 \text{ eV}$   
 $i = \nu_{33}, \alpha = T_1 ({}^3T_{1g}, \beta = T_6 ({}^3T_{2g}): 0.006 \text{ eV}$   
 $i = \nu_{33}, \alpha = T_2 ({}^3T_{1g}, \beta = T_4 ({}^3T_{2g}): 0.002 \text{ eV}$   
 $i = \nu_{33}, \alpha = T_2 ({}^3T_{1g}, \beta = T_6 ({}^3T_{2g}): 0.002 \text{ eV}$   
 $i = \nu_{33}, \alpha = T_3 ({}^3T_{1g}, \beta = T_6 ({}^3T_{2g}): 0.002 \text{ eV}$   
 $i = \nu_{34}, \alpha = T_2 ({}^3T_{1g}, \beta = T_5 ({}^3T_{2g}): 0.004 \text{ eV}$   
 $i = \nu_{34}, \alpha = T_3 ({}^3T_{1g}, \beta = T_4 ({}^3T_{2g}): 0.002 \text{ eV}$   
 $i = \nu_{35}, \alpha = T_3 ({}^3T_{1g}, \beta = T_6 ({}^3T_{2g}): 0.004 \text{ eV}$   
 $i = \nu_{36}, \alpha = T_2 ({}^3T_{1g}, \beta = T_4 ({}^3T_{2g}): 0.001 \text{ eV}$   
 $i = \nu_{36}, \alpha = T_3 ({}^3T_{1g}, \beta = T_4 ({}^3T_{2g}): 0.005 \text{ eV}$   
 $i = \nu_{37}, \alpha = T_1 ({}^3T_{1g}, \beta = T_5 ({}^3T_{2g}): 0.003 \text{ eV}$   
 $i = \nu_{37}, \alpha = T_2 ({}^3T_{1g}, \beta = T_4 ({}^3T_{2g}): 0.002 \text{ eV}$   
 $i = \nu_{37}, \alpha = T_2 ({}^3T_{1g}, \beta = T_5 ({}^3T_{2g}): 0.002 \text{ eV}$   
 $i = \nu_{37}, \alpha = T_2 ({}^3T_{1g}, \beta = T_6 ({}^3T_{2g}): 0.035 \text{ eV}$   
 $i = \nu_{37}, \alpha = T_3 ({}^3T_{1g}, \beta = T_4 ({}^3T_{2g}): 0.007 \text{ eV}$   
 $i = \nu_{37}, \alpha = T_3 ({}^3T_{1g}, \beta = T_5 ({}^3T_{2g}): 0.008 \text{ eV}$   
 $i = \nu_{38}, \alpha = T_1 ({}^3T_{1g}, \beta = T_5 ({}^3T_{2g}): 0.002 \text{ eV}$   
 $i = \nu_{38}, \alpha = T_2 ({}^3T_{1g}, \beta = T_4 ({}^3T_{2g}): 0.002 \text{ eV}$   
 $i = \nu_{38}, \alpha = T_3 ({}^3T_{1g}, \beta = T_4 ({}^3T_{2g}): 0.001 \text{ eV}$   
 $i = \nu_{39}, \alpha = T_2 ({}^3T_{1g}, \beta = T_6 ({}^3T_{2g}): 0.013 \text{ eV}$   
 $i = \nu_{39}, \alpha = T_3 ({}^3T_{1g}, \beta = T_4 ({}^3T_{2g}): 0.002 \text{ eV}$   
 $i = \nu_{39}, \alpha = T_3 ({}^3T_{1g}, \beta = T_5 ({}^3T_{2g}): 0.011 \text{ eV}$

$i = \nu_{39}, \alpha = T_3 (^3T_{1g}, \beta = T_6 (^3T_{2g}): 0.002 \text{ eV}$   
 $i = \nu_{40}, \alpha = T_1 (^3T_{1g}, \beta = T_3 (^3T_{1g}): 0.012 \text{ eV}$   
 $i = \nu_{40}, \alpha = T_1 (^3T_{1g}, \beta = T_4 (^3T_{2g}): 0.001 \text{ eV}$   
 $i = \nu_{40}, \alpha = T_2 (^3T_{1g}, \beta = T_5 (^3T_{2g}): 0.025 \text{ eV}$   
 $i = \nu_{40}, \alpha = T_3 (^3T_{1g}, \beta = T_5 (^3T_{2g}): 0.002 \text{ eV}$   
 $i = \nu_{40}, \alpha = T_3 (^3T_{1g}, \beta = T_6 (^3T_{2g}): 0.001 \text{ eV}$   
 $i = \nu_{40}, \alpha = T_4 (^3T_{2g}, \beta = T_5 (^3T_{2g}): 0.002 \text{ eV}$   
 $i = \nu_{40}, \alpha = T_5 (^3T_{2g}, \beta = T_6 (^3T_{2g}): 0.001 \text{ eV}$   
 $i = \nu_{41}, \alpha = T_1 (^3T_{1g}, \beta = T_2 (^3T_{1g}): 0.012 \text{ eV}$   
 $i = \nu_{41}, \alpha = T_1 (^3T_{1g}, \beta = T_4 (^3T_{2g}): 0.002 \text{ eV}$   
 $i = \nu_{41}, \alpha = T_2 (^3T_{1g}, \beta = T_4 (^3T_{2g}): 0.003 \text{ eV}$   
 $i = \nu_{41}, \alpha = T_2 (^3T_{1g}, \beta = T_5 (^3T_{2g}): 0.023 \text{ eV}$   
 $i = \nu_{41}, \alpha = T_5 (^3T_{2g}, \beta = T_6 (^3T_{2g}): 0.008 \text{ eV}$   
 $i = \nu_{42}, \alpha = T_1 (^3T_{1g}, \beta = T_5 (^3T_{2g}): 0.001 \text{ eV}$   
 $i = \nu_{42}, \alpha = T_2 (^3T_{1g}, \beta = T_6 (^3T_{2g}): 0.001 \text{ eV}$   
 $i = \nu_{43}, \alpha = T_1 (^3T_{1g}, \beta = T_4 (^3T_{2g}): 0.002 \text{ eV}$   
 $i = \nu_{43}, \alpha = T_2 (^3T_{1g}, \beta = T_4 (^3T_{2g}): 0.002 \text{ eV}$   
 $i = \nu_{43}, \alpha = T_2 (^3T_{1g}, \beta = T_5 (^3T_{2g}): 0.003 \text{ eV}$   
 $i = \nu_{43}, \alpha = T_2 (^3T_{1g}, \beta = T_6 (^3T_{2g}): 0.003 \text{ eV}$   
 $i = \nu_{43}, \alpha = T_3 (^3T_{1g}, \beta = T_4 (^3T_{2g}): 0.005 \text{ eV}$   
 $i = \nu_{43}, \alpha = T_3 (^3T_{1g}, \beta = T_5 (^3T_{2g}): 0.002 \text{ eV}$   
 $i = \nu_{44}, \alpha = T_1 (^3T_{1g}, \beta = T_6 (^3T_{2g}): 0.004 \text{ eV}$   
 $i = \nu_{44}, \alpha = T_2 (^3T_{1g}, \beta = T_4 (^3T_{2g}): 0.004 \text{ eV}$   
 $i = \nu_{44}, \alpha = T_2 (^3T_{1g}, \beta = T_5 (^3T_{2g}): 0.005 \text{ eV}$   
 $i = \nu_{44}, \alpha = T_3 (^3T_{1g}, \beta = T_5 (^3T_{2g}): 0.003 \text{ eV}$   
 $i = \nu_{45}, \alpha = T_2 (^3T_{1g}, \beta = T_6 (^3T_{2g}): 0.005 \text{ eV}$   
 $i = \nu_{45}, \alpha = T_3 (^3T_{1g}, \beta = T_4 (^3T_{2g}): 0.002 \text{ eV}$   
 $i = \nu_{45}, \alpha = T_3 (^3T_{1g}, \beta = T_5 (^3T_{2g}): 0.004 \text{ eV}$   
 $i = \nu_{45}, \alpha = T_3 (^3T_{1g}, \beta = T_6 (^3T_{2g}): 0.001 \text{ eV}$   
 $i = \nu_{46}, \alpha = T_1 (^3T_{1g}, \beta = T_2 (^3T_{1g}): 0.001 \text{ eV}$   
 $i = \nu_{46}, \alpha = T_1 (^3T_{1g}, \beta = T_4 (^3T_{2g}): 0.004 \text{ eV}$   
 $i = \nu_{46}, \alpha = T_2 (^3T_{1g}, \beta = T_4 (^3T_{2g}): 0.005 \text{ eV}$   
 $i = \nu_{46}, \alpha = T_2 (^3T_{1g}, \beta = T_5 (^3T_{2g}): 0.003 \text{ eV}$   
 $i = \nu_{46}, \alpha = T_2 (^3T_{1g}, \beta = T_6 (^3T_{2g}): 0.018 \text{ eV}$   
 $i = \nu_{46}, \alpha = T_3 (^3T_{1g}, \beta = T_4 (^3T_{2g}): 0.003 \text{ eV}$   
 $i = \nu_{46}, \alpha = T_3 (^3T_{1g}, \beta = T_5 (^3T_{2g}): 0.018 \text{ eV}$

$$\begin{aligned}
i = \nu_{47}, \alpha = T_1 ({}^3T_{1g}, \beta = T_3 ({}^3T_{1g}): 0.002 \text{ eV} \\
i = \nu_{47}, \alpha = T_1 ({}^3T_{1g}, \beta = T_4 ({}^3T_{2g}): 0.005 \text{ eV} \\
i = \nu_{47}, \alpha = T_1 ({}^3T_{1g}, \beta = T_5 ({}^3T_{2g}): 0.009 \text{ eV} \\
i = \nu_{47}, \alpha = T_2 ({}^3T_{1g}, \beta = T_5 ({}^3T_{2g}): 0.004 \text{ eV} \\
i = \nu_{47}, \alpha = T_2 ({}^3T_{1g}, \beta = T_6 ({}^3T_{2g}): 0.010 \text{ eV} \\
i = \nu_{47}, \alpha = T_3 ({}^3T_{1g}, \beta = T_5 ({}^3T_{2g}): 0.013 \text{ eV} \\
i = \nu_{48}, \alpha = T_1 ({}^3T_{1g}, \beta = T_4 ({}^3T_{2g}): 0.005 \text{ eV} \\
i = \nu_{48}, \alpha = T_2 ({}^3T_{1g}, \beta = T_5 ({}^3T_{2g}): 0.004 \text{ eV} \\
i = \nu_{48}, \alpha = T_2 ({}^3T_{1g}, \beta = T_6 ({}^3T_{2g}): 0.006 \text{ eV} \\
i = \nu_{48}, \alpha = T_3 ({}^3T_{1g}, \beta = T_4 ({}^3T_{2g}): 0.010 \text{ eV} \\
i = \nu_{48}, \alpha = T_3 ({}^3T_{1g}, \beta = T_5 ({}^3T_{2g}): 0.001 \text{ eV} \\
i = \nu_{48}, \alpha = T_3 ({}^3T_{1g}, \beta = T_6 ({}^3T_{2g}): 0.003 \text{ eV} \\
i = \nu_{49}, \alpha = T_1 ({}^3T_{1g}, \beta = T_5 ({}^3T_{2g}): 0.005 \text{ eV} \\
i = \nu_{49}, \alpha = T_3 ({}^3T_{1g}, \beta = T_4 ({}^3T_{2g}): 0.002 \text{ eV} \\
i = \nu_{50}, \alpha = T_2 ({}^3T_{1g}, \beta = T_4 ({}^3T_{2g}): 0.002 \text{ eV} \\
i = \nu_{50}, \alpha = T_2 ({}^3T_{1g}, \beta = T_5 ({}^3T_{2g}): 0.003 \text{ eV} \\
i = \nu_{51}, \alpha = T_3 ({}^3T_{1g}, \beta = T_6 ({}^3T_{2g}): 0.001 \text{ eV}
\end{aligned}$$

First-order off-diagonal coefficients  $\lambda_i^{(\alpha\beta)}$  for LVC-B3LYP\* ( $\geq 0.001$  eV) quintet states:

$$\begin{aligned}
i = \nu_5, \alpha = Q_1 ({}^5T_{2g}), \beta = Q_2 ({}^5T_{2g}): 0.011 \text{ eV} \\
i = \nu_5, \alpha = Q_2 ({}^5T_{2g}), \beta = Q_3 ({}^5T_{2g}): 0.003 \text{ eV} \\
i = \nu_6, \alpha = Q_1 ({}^5T_{2g}), \beta = Q_2 ({}^5T_{2g}): 0.013 \text{ eV} \\
i = \nu_{14}, \alpha = Q_1 ({}^5T_{2g}), \beta = Q_3 ({}^5T_{2g}): 0.031 \text{ eV} \\
i = \nu_{23}, \alpha = Q_2 ({}^5T_{2g}), \beta = Q_3 ({}^5T_{2g}): 0.003 \text{ eV} \\
i = \nu_{37}, \alpha = Q_1 ({}^5T_{2g}), \beta = Q_2 ({}^5T_{2g}): 0.004 \text{ eV} \\
i = \nu_{40}, \alpha = Q_1 ({}^5T_{2g}), \beta = Q_3 ({}^5T_{2g}): 0.027 \text{ eV} \\
i = \nu_{47}, \alpha = Q_1 ({}^5T_{2g}), \beta = Q_3 ({}^5T_{2g}): 0.010 \text{ eV}
\end{aligned}$$



**Table S9:** CASPT2 singlet-triplet SOC matrix elements ( $\text{cm}^{-1}$ ) calculated at the FC geometry. For simplicity, only the FC adiabatic labels are used, for the corresponding diabatic labels see, e.g., Table S2. Elements not shown in the table are below  $1 \text{ cm}^{-1}$ .

| SOC                                               | $m_s = -1$ |        | $m_s = 0$ |        | $m_s = 1$ |        |
|---------------------------------------------------|------------|--------|-----------|--------|-----------|--------|
|                                                   | Re         | Im     | Re        | Im     | Re        | Im     |
| $\langle S_0   \hat{H}_{\text{SO}}   T_1 \rangle$ | -390.9     |        |           |        | -390.9    |        |
| $\langle S_0   \hat{H}_{\text{SO}}   T_2 \rangle$ |            |        |           | 552.9  |           |        |
| $\langle S_0   \hat{H}_{\text{SO}}   T_3 \rangle$ |            | -390.9 |           |        |           | 390.9  |
| $\langle S_1   \hat{H}_{\text{SO}}   T_2 \rangle$ |            | -64.5  |           |        |           | 64.5   |
| $\langle S_1   \hat{H}_{\text{SO}}   T_3 \rangle$ |            |        |           | -91.3  |           |        |
| $\langle S_1   \hat{H}_{\text{SO}}   T_5 \rangle$ |            | 173.9  |           |        |           | -173.9 |
| $\langle S_1   \hat{H}_{\text{SO}}   T_6 \rangle$ |            |        |           | -245.9 |           |        |
| $\langle S_2   \hat{H}_{\text{SO}}   T_1 \rangle$ |            | -64.5  |           |        |           | 64.5   |
| $\langle S_2   \hat{H}_{\text{SO}}   T_3 \rangle$ | 64.5       |        |           |        | 64.5      |        |
| $\langle S_2   \hat{H}_{\text{SO}}   T_4 \rangle$ |            | -173.9 |           |        |           | 173.9  |
| $\langle S_2   \hat{H}_{\text{SO}}   T_6 \rangle$ | -173.9     |        |           |        | -173.9    |        |
| $\langle S_3   \hat{H}_{\text{SO}}   T_1 \rangle$ |            |        |           | -91.3  |           |        |
| $\langle S_3   \hat{H}_{\text{SO}}   T_2 \rangle$ | -64.5      |        |           |        | -64.5     |        |
| $\langle S_3   \hat{H}_{\text{SO}}   T_4 \rangle$ |            |        |           | 245.9  |           |        |
| $\langle S_3   \hat{H}_{\text{SO}}   T_5 \rangle$ | -173.9     |        |           |        | -173.9    |        |
| $\langle S_3   \hat{H}_{\text{SO}}   T_5 \rangle$ | -173.9     |        |           |        | -173.9    |        |

**Table S10:** CASPT2 triplet-triplet SOC matrix elements ( $\text{cm}^{-1}$ ) calculated at the FC geometry. For simplicity, only the FC adiabatic labels are used, for the corresponding diabatic labels see, e.g., Table S2. Elements not shown in the table are below  $1 \text{ cm}^{-1}$ .

| SOC                                                    | $m_s = -1$ |        | $m_s = 0$ |        | $m_s = 1$ |        |
|--------------------------------------------------------|------------|--------|-----------|--------|-----------|--------|
|                                                        | Re         | Im     | Re        | Im     | Re        | Im     |
| $\langle T_{1,-1}   \hat{H}_{\text{SO}}   T_2 \rangle$ |            |        |           | -100.8 |           |        |
| $\langle T_{1,-1}   \hat{H}_{\text{SO}}   T_3 \rangle$ |            | 142.5  |           |        |           |        |
| $\langle T_{1,-1}   \hat{H}_{\text{SO}}   T_5 \rangle$ |            |        |           |        |           |        |
| $\langle T_{1,-1}   \hat{H}_{\text{SO}}   T_6 \rangle$ |            | 170.6  |           |        |           |        |
| $\langle T_{1,0}   \hat{H}_{\text{SO}}   T_2 \rangle$  |            | -100.8 |           |        |           | -100.8 |
| $\langle T_{1,0}   \hat{H}_{\text{SO}}   T_5 \rangle$  |            | 120.6  |           |        |           | 120.6  |
| $\langle T_{1,1}   \hat{H}_{\text{SO}}   T_2 \rangle$  |            |        |           | -100.8 |           |        |
| $\langle T_{1,1}   \hat{H}_{\text{SO}}   T_3 \rangle$  |            |        |           |        |           | -142.5 |
| $\langle T_{1,1}   \hat{H}_{\text{SO}}   T_5 \rangle$  |            |        |           | 120.6  |           |        |
| $\langle T_{1,1}   \hat{H}_{\text{SO}}   T_6 \rangle$  |            |        |           |        |           | -170.6 |
| $\langle T_{2,-1}   \hat{H}_{\text{SO}}   T_3 \rangle$ |            |        | 100.8     |        |           |        |
| $\langle T_{2,-1}   \hat{H}_{\text{SO}}   T_4 \rangle$ |            |        |           | 120.6  |           |        |
| $\langle T_{2,-1}   \hat{H}_{\text{SO}}   T_6 \rangle$ |            |        | -120.6    |        |           |        |
| $\langle T_{2,0}   \hat{H}_{\text{SO}}   T_3 \rangle$  | -100.8     |        |           |        | 100.8     |        |
| $\langle T_{2,0}   \hat{H}_{\text{SO}}   T_4 \rangle$  |            | 120.6  |           |        |           | 120.6  |
| $\langle T_{2,0}   \hat{H}_{\text{SO}}   T_6 \rangle$  | 120.6      |        |           |        | -120.6    |        |
| $\langle T_{2,1}   \hat{H}_{\text{SO}}   T_3 \rangle$  |            |        | -100.8    |        |           |        |
| $\langle T_{2,1}   \hat{H}_{\text{SO}}   T_4 \rangle$  |            |        |           | 120.6  |           |        |
| $\langle T_{2,1}   \hat{H}_{\text{SO}}   T_6 \rangle$  |            |        | 120.6     |        |           |        |
| $\langle T_{3,-1}   \hat{H}_{\text{SO}}   T_4 \rangle$ |            | 170.6  |           |        |           |        |
| $\langle T_{3,-1}   \hat{H}_{\text{SO}}   T_5 \rangle$ |            |        | -120.6    |        |           |        |
| $\langle T_{3,0}   \hat{H}_{\text{SO}}   T_5 \rangle$  | 120.6      |        |           |        | -120.6    |        |
| $\langle T_{3,1}   \hat{H}_{\text{SO}}   T_4 \rangle$  |            |        |           |        |           | -170.6 |
| $\langle T_{3,1}   \hat{H}_{\text{SO}}   T_5 \rangle$  |            |        | 120.6     |        |           |        |
| $\langle T_{4,-1}   \hat{H}_{\text{SO}}   T_5 \rangle$ |            |        |           | -98.2  |           |        |
| $\langle T_{4,-1}   \hat{H}_{\text{SO}}   T_6 \rangle$ |            | 138.9  |           |        |           |        |
| $\langle T_{4,0}   \hat{H}_{\text{SO}}   T_5 \rangle$  |            | -98.2  |           |        |           | -98.2  |
| $\langle T_{4,1}   \hat{H}_{\text{SO}}   T_5 \rangle$  |            |        |           | -98.2  |           |        |
| $\langle T_{4,1}   \hat{H}_{\text{SO}}   T_6 \rangle$  |            |        |           |        |           | -138.5 |
| $\langle T_{5,-1}   \hat{H}_{\text{SO}}   T_6 \rangle$ |            |        | 98.2      |        |           |        |
| $\langle T_{5,0}   \hat{H}_{\text{SO}}   T_6 \rangle$  | -98.2      |        |           |        | 98.2      |        |
| $\langle T_{5,1}   \hat{H}_{\text{SO}}   T_6 \rangle$  |            |        | -98.2     |        |           |        |

**Table S11:** CASPT2 triplet-quintet real SOC matrix elements ( $\text{cm}^{-1}$ ) calculated at the FC geometry. For simplicity, only the FC adiabatic labels are used, for the corresponding diabatic labels see, e.g., Table S2. Elements not shown in the table are below  $1 \text{ cm}^{-1}$ .

| Real SOC                                               | $m_s = -2$ | $m_s = -1$ | $m_s = 0$ | $m_s = 1$ | $m_s = 2$ |
|--------------------------------------------------------|------------|------------|-----------|-----------|-----------|
| $\langle T_{2,-1}   \hat{H}_{\text{SO}}   Q_3 \rangle$ | 335.4      |            | 136.9     |           |           |
| $\langle T_{2,0}   \hat{H}_{\text{SO}}   Q_3 \rangle$  |            | 237.1      |           | 237.1     |           |
| $\langle T_{2,1}   \hat{H}_{\text{SO}}   Q_3 \rangle$  |            |            | 136.9     |           | 335.4     |
| $\langle T_{3,-1}   \hat{H}_{\text{SO}}   Q_2 \rangle$ | 335.4      |            | 136.9     |           |           |
| $\langle T_{3,0}   \hat{H}_{\text{SO}}   Q_2 \rangle$  |            | 237.1      |           | 237.1     |           |
| $\langle T_{3,1}   \hat{H}_{\text{SO}}   Q_2 \rangle$  |            |            | 136.9     |           | 335.4     |
| $\langle T_{5,-1}   \hat{H}_{\text{SO}}   Q_3 \rangle$ | 201.5      |            | 82.3      |           |           |
| $\langle T_{5,0}   \hat{H}_{\text{SO}}   Q_3 \rangle$  |            | 142.5      |           | 142.5     |           |
| $\langle T_{5,1}   \hat{H}_{\text{SO}}   Q_3 \rangle$  |            |            | 82.3      |           | 201.5     |
| $\langle T_{6,-1}   \hat{H}_{\text{SO}}   Q_2 \rangle$ | -201.5     |            | -82.3     |           |           |
| $\langle T_{6,0}   \hat{H}_{\text{SO}}   Q_2 \rangle$  |            | -142.5     |           | -142.5    |           |
| $\langle T_{6,1}   \hat{H}_{\text{SO}}   Q_2 \rangle$  |            |            | -82.3     |           | -201.5    |

**Table S12:** CASPT2 triplet-quintet imaginary SOC matrix elements ( $\text{cm}^{-1}$ ) calculated at the FC geometry. For simplicity, only the FC adiabatic labels are used, for the corresponding diabatic labels see, e.g., Table S2. Elements not shown in the table are below  $1 \text{ cm}^{-1}$ .

| Imaginary SOC                                          | $m_s = -2$ | $m_s = -1$ | $m_s = 0$ | $m_s = 1$ | $m_s = 2$ |
|--------------------------------------------------------|------------|------------|-----------|-----------|-----------|
| $\langle T_{1,-1}   \hat{H}_{\text{SO}}   Q_2 \rangle$ | 335.4      |            | -136.9    |           |           |
| $\langle T_{1,-1}   \hat{H}_{\text{SO}}   Q_3 \rangle$ |            | -335.4     |           |           |           |
| $\langle T_{1,0}   \hat{H}_{\text{SO}}   Q_2 \rangle$  |            | 237.1      |           | -237.1    |           |
| $\langle T_{1,0}   \hat{H}_{\text{SO}}   Q_3 \rangle$  |            |            | -387.3    |           |           |
| $\langle T_{1,1}   \hat{H}_{\text{SO}}   Q_2 \rangle$  |            |            | 136.9     |           | -335.4    |
| $\langle T_{1,1}   \hat{H}_{\text{SO}}   Q_3 \rangle$  |            |            |           | -335.4    |           |
| $\langle T_{2,-1}   \hat{H}_{\text{SO}}   Q_1 \rangle$ | 335.4      |            | -136.9    |           |           |
| $\langle T_{2,0}   \hat{H}_{\text{SO}}   Q_1 \rangle$  |            | 237.1      |           | -237.1    |           |
| $\langle T_{2,1}   \hat{H}_{\text{SO}}   Q_1 \rangle$  |            |            | 136.9     |           | -335.4    |
| $\langle T_{3,-1}   \hat{H}_{\text{SO}}   Q_1 \rangle$ |            | -335.4     |           |           |           |
| $\langle T_{3,0}   \hat{H}_{\text{SO}}   Q_1 \rangle$  |            |            | -387.3    |           |           |
| $\langle T_{3,1}   \hat{H}_{\text{SO}}   Q_1 \rangle$  |            |            |           | -335.4    |           |
| $\langle T_{4,-1}   \hat{H}_{\text{SO}}   Q_2 \rangle$ | 201.5      |            | -82.3     |           |           |
| $\langle T_{4,-1}   \hat{H}_{\text{SO}}   Q_3 \rangle$ |            | 201.5      |           |           |           |
| $\langle T_{4,0}   \hat{H}_{\text{SO}}   Q_2 \rangle$  |            | 142.5      |           | -142.5    |           |
| $\langle T_{4,0}   \hat{H}_{\text{SO}}   Q_3 \rangle$  |            |            | 232.7     |           |           |
| $\langle T_{4,1}   \hat{H}_{\text{SO}}   Q_2 \rangle$  |            |            | 82.3      |           | -201.5    |
| $\langle T_{4,1}   \hat{H}_{\text{SO}}   Q_3 \rangle$  |            |            |           | 201.5     |           |
| $\langle T_{5,-1}   \hat{H}_{\text{SO}}   Q_1 \rangle$ | -201.5     |            | 82.3      |           |           |
| $\langle T_{5,0}   \hat{H}_{\text{SO}}   Q_1 \rangle$  |            | -142.5     |           | 142.5     |           |
| $\langle T_{5,1}   \hat{H}_{\text{SO}}   Q_1 \rangle$  |            |            | -82.3     |           | 201.5     |
| $\langle T_{6,-1}   \hat{H}_{\text{SO}}   Q_1 \rangle$ |            | -201.5     |           |           |           |
| $\langle T_{6,0}   \hat{H}_{\text{SO}}   Q_1 \rangle$  |            |            | -232.7    |           |           |
| $\langle T_{6,1}   \hat{H}_{\text{SO}}   Q_1 \rangle$  |            |            |           | -201.5    |           |

**Table S13:** CASPT2 quintet-quintet real SOC matrix elements ( $\text{cm}^{-1}$ ) calculated at the FC geometry. For simplicity, only the FC adiabatic labels are used, for the corresponding diabatic labels see, e.g., Table S2. Elements not shown in the table are below  $1 \text{ cm}^{-1}$ .

| Real SOC                                               | $m_s = -2$ | $m_s = -1$ | $m_s = 0$ | $m_s = 1$ | $m_s = 2$ |
|--------------------------------------------------------|------------|------------|-----------|-----------|-----------|
| $\langle Q_{2,-2}   \hat{H}_{\text{SO}}   Q_3 \rangle$ |            | -84.6      |           |           |           |
| $\langle Q_{2,-1}   \hat{H}_{\text{SO}}   Q_3 \rangle$ | 84.6       |            | -103.6    |           |           |
| $\langle Q_{2,0}   \hat{H}_{\text{SO}}   Q_3 \rangle$  |            | 103.6      |           | -103.6    |           |
| $\langle Q_{2,1}   \hat{H}_{\text{SO}}   Q_3 \rangle$  |            |            | 103.6     |           | -84.6     |
| $\langle Q_{2,2}   \hat{H}_{\text{SO}}   Q_3 \rangle$  |            |            |           | 84.6      |           |

**Table S14:** CASPT2 quintet-quintet imaginary SOC matrix elements ( $\text{cm}^{-1}$ ) calculated at the FC geometry. For simplicity, only the FC adiabatic labels are used, for the corresponding diabatic labels see, e.g., Table S2. Elements not shown in the table are below  $1 \text{ cm}^{-1}$ .

| Imaginary SOC                                          | $m_s = -2$ | $m_s = -1$ | $m_s = 0$ | $m_s = 1$ | $m_s = 2$ |
|--------------------------------------------------------|------------|------------|-----------|-----------|-----------|
| $\langle Q_{1,-2}   \hat{H}_{\text{SO}}   Q_2 \rangle$ |            | 84.6       |           |           |           |
| $\langle Q_{1,-2}   \hat{H}_{\text{SO}}   Q_3 \rangle$ | -169.2     |            |           |           |           |
| $\langle Q_{1,-1}   \hat{H}_{\text{SO}}   Q_2 \rangle$ | 84.6       |            | 103.6     |           |           |
| $\langle Q_{1,-1}   \hat{H}_{\text{SO}}   Q_3 \rangle$ |            | -84.6      |           |           |           |
| $\langle Q_{1,0}   \hat{H}_{\text{SO}}   Q_2 \rangle$  |            | 103.6      |           | 103.6     |           |
| $\langle Q_{1,1}   \hat{H}_{\text{SO}}   Q_2 \rangle$  |            |            | 103.6     |           | 84.6      |
| $\langle Q_{1,1}   \hat{H}_{\text{SO}}   Q_3 \rangle$  |            |            |           | 84.6      |           |
| $\langle Q_{1,2}   \hat{H}_{\text{SO}}   Q_2 \rangle$  |            |            |           | 84.6      |           |
| $\langle Q_{1,2}   \hat{H}_{\text{SO}}   Q_3 \rangle$  |            |            |           |           | 169.2     |

### S3 Diabatic and Adiabatic/Spin-Diabatic Potentials

We here analyze the diabatic potentials and coupling strengths for the three different models LVC-B3LYP\*, VCHAM-B3LYP\*, and VCHAM-CASPT2, which the dynamics simulations are based on. We first consider the antisymmetric Fe-N stretching modes. Figure S1 shows the diabatic PESs along the component of the degenerate antisymmetric Fe-N stretching vibrations ( $\nu_{13}$  or  $\nu_{14}$ ), which accounts for stronger vibronic effects in the diabatic potentials, quantified by the linear on-diagonal  $\kappa_i^{(\alpha)}$  constants. As seen in Figure S1, the singlet and triplet PESs along  $\nu_{13}/\nu_{14}$  (light blue and green) split, and importantly, the  $^1T_{1g}$  and  $^3T_{2g}$  potentials cross in regions that are easily accessible by the wavepacket in the initially excited  $^1T_{1g}$  states. This is the reason for the fast ( $\sim 100$ – $300$  fs) singlet-triplet ISC. The overall agreement for the PESs shown in Figure S1 is rather good, which supports the adequacy of B3LYP\*, as well as the LVC approach for constructing diabatic states. In order to analyze the singlet-triplet ISC, it is also important to consider the magnitude of nonadiabatic couplings between the singlet excited states; this is also shown in Figure S1 for the two antisymmetric Fe-N stretching modes,  $\nu_{13}$  and  $\nu_{14}$ . As seen in the figure, the magnitude of singlet couplings is comparable for the three methods, with the weakest coupling strengths for LVC-B3LYP\*. However, even in the case of these weaker couplings ( $0.01$ – $0.05$  eV), the LVC-B3LYP\*  $^1T_{1g}/^3T_{2g}$  crossings are easily accessible, as reflected by the  $\sim 200$ – $300$  fs singlet-triplet ISC timescales obtained by the corresponding TSH and QD simulations (see Figures 4a,c in the article).

In Figure S2, we present the PESs along the totally symmetric Fe-N stretching mode  $\nu_{15}$ , which, as discussed in Section 4.1 in the article, is the key mode for the quintet states (double occupation of  $e_g^*$  orbitals). Similarly to the case of the antisymmetric Fe-N stretching modes, the overall agreement is rather good. There are two aspects, though, for which the DFT/TD-DFT (B3LYP\*) and CASPT2 results differ: i) the separation of the two triplet manifolds  $^3T_{1g}$  and  $^3T_{2g}$  is roughly twice as large for CASPT2 (Figure S2, panel c) than for B3LYP\* (Figure S2, panels a and b), and ii) in contrast to CASPT2, for B3LYP\*, the perfect triple degeneracy of the quintet  $^5T_{2g}$  states along  $\nu_{15}$  is not maintained, which is a consequence of the description of the lowest quintet by a single Slater determinant (unrestricted DFT) and the other two by quintet TD-DFT. In addition, for LVC-B3LYP\* (Figure S2, panel a), the HS-LS energy gap along  $\nu_{15}$  is lowered by  $\sim 0.2$ – $0.3$  eV. However, as is clear from Figure 4 in the article, these variations in the PESs along  $\nu_{15}$  do not lead to any qualitative differences in the simulated dynamics. We note that nonadiabatic couplings are negligible for mode  $\nu_{15}$ .<sup>2</sup>

Figures S3–S5 and S6–S8 show the B3LYP\* (DFT/TD-DFT) adiabatic/spin-diabatic PESs of  $[\text{Fe}(\text{NCH})_6]^{2+}$ , obtained by the VCHAM and LVC methods, respectively. In the case of VCHAM, both quantum chemistry data points and energy curves obtained by the diagonalization of the diabatic Hamiltonian (fits) are shown. We note again that for VCHAM, modes  $\nu_{13}$ ,  $\nu_{14}$  (antisymmetric modes), we had to include three additional singlet excited states (i.e., the three components of the  $^1T_{2g}$  manifold), as the  $^1T_{1g}$ - $^1T_{2g}$  states interact along  $\nu_{13}$  and  $\nu_{14}$ ; this was not necessary for LVC, as the quantum chemistry calculations were only performed in the vicinity of the FC geometry, where no

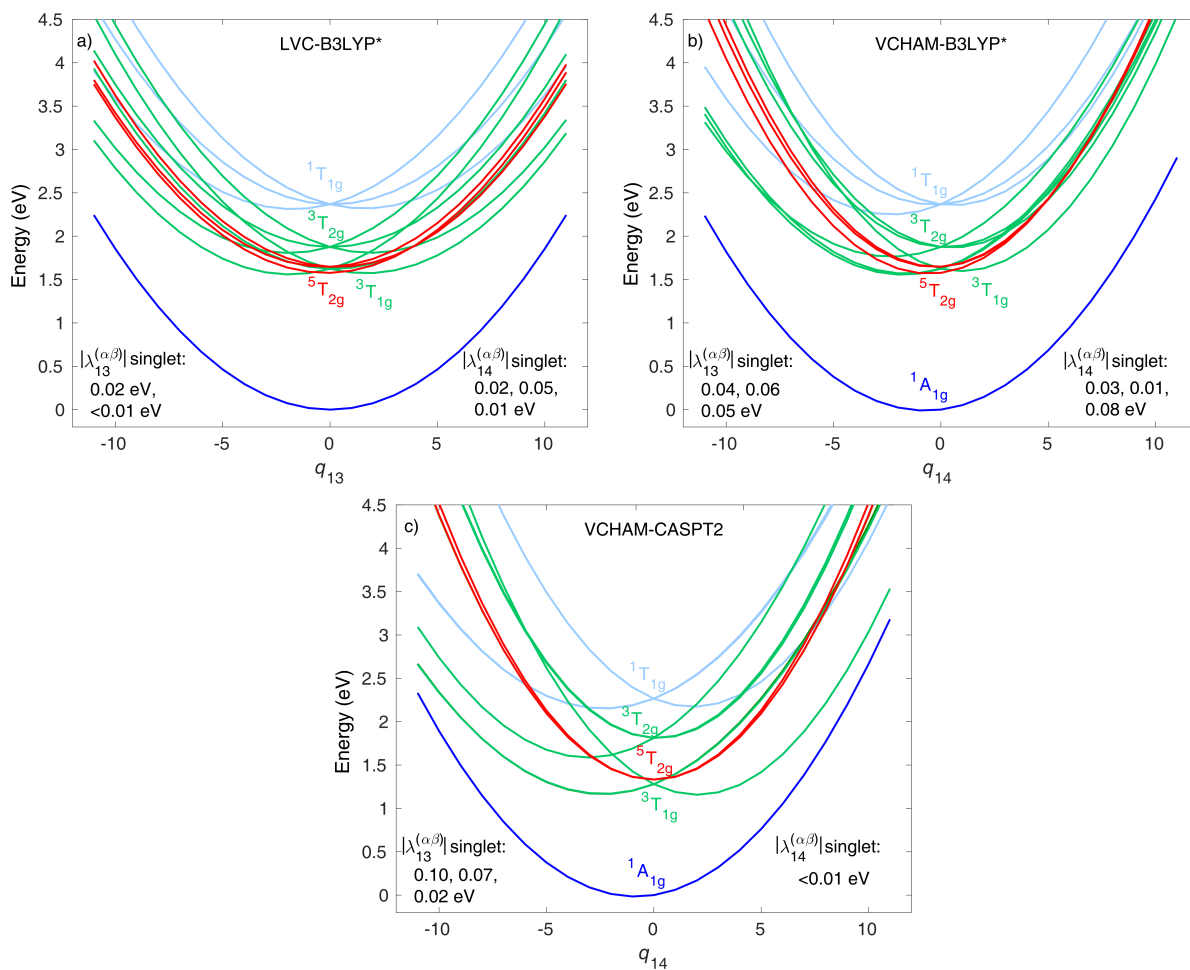

**Figure S1:** Diabatic 1D PESs of  $[\text{Fe}(\text{NCH})_6]^{2+}$  along the antisymmetric Fe-N stretching mode ( $\nu_{13}$  or  $\nu_{14}$ ) that is dominant based on the values of the linear diagonal constants  $\kappa_i^{(\alpha)}$  values. The magnitude of the singlet linear off-diagonal  $\lambda_i^{(\alpha\beta)}$  values for modes  $\nu_{13}$  and  $\nu_{14}$  are also shown. The three panels show the PESs for a) LVC-B3LYP\*, b) VCHAM-B3LYP\*, and c) VCHAM-CASPT2.

$1T_{1g}$ - $1T_{2g}$  interaction occurs.

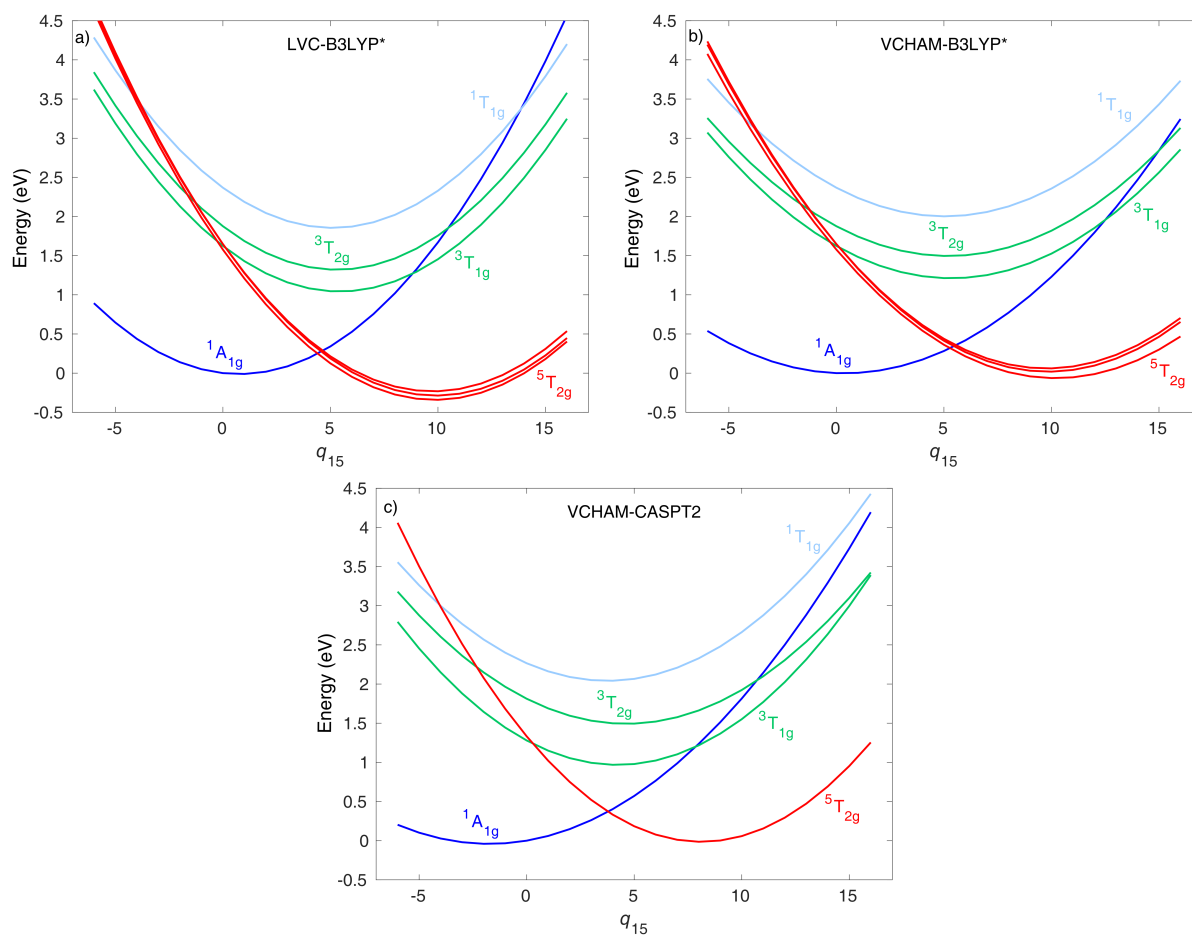

**Figure S2:** Diabatic 1D PESs of  $[\text{Fe}(\text{NCH})_6]^{2+}$  along the totally symmetric Fe-N stretching mode  $\nu_{15}$ . The three panels show the PESs for a) LVC-B3LYP\*, b) VCHAM-B3LYP\*, and c) VCHAM-CASPT2.



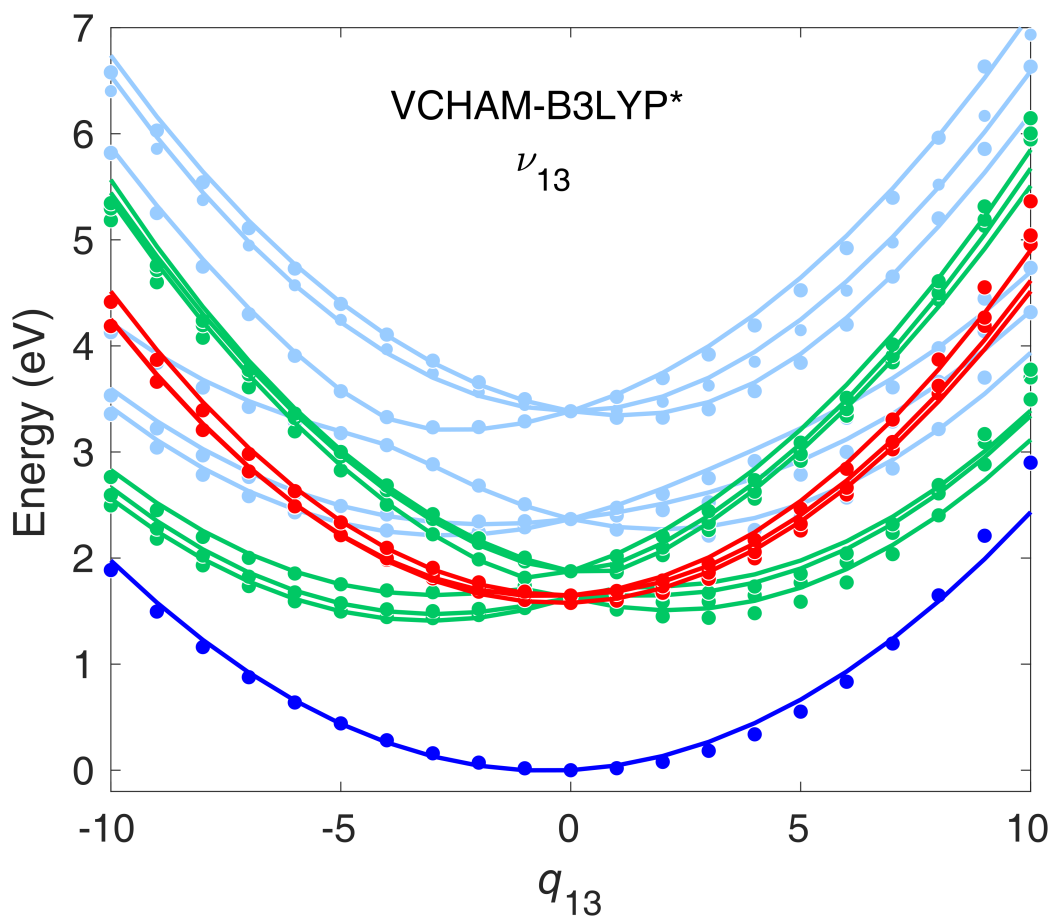

**Figure S3:** DFT/TD-DFT (B3LYP\*) adiabatic/spin-diabatic potential energy surfaces of  $[\text{Fe}(\text{NCH})_6]^{2+}$  along  $\nu_{13}$ . Obtained by using the VCHAM method. The dots are the energies calculated by quantum chemistry, while the lines correspond to their VCHAM fit. The following colour code is used: blue – ground state ( $S_0$ ), light blue – singlet excited states ( $S_1$ – $S_6$ ;  $^1T_{1g}$  and  $^1T_{2g}$ ), green – triplet excited states  $T_1$ – $T_6$ ;  $^3T_{1g}$  and  $^3T_{2g}$ ), red – quintet excited states ( $Q_1$ – $Q_3$ ;  $^5T_{2g}$ ).

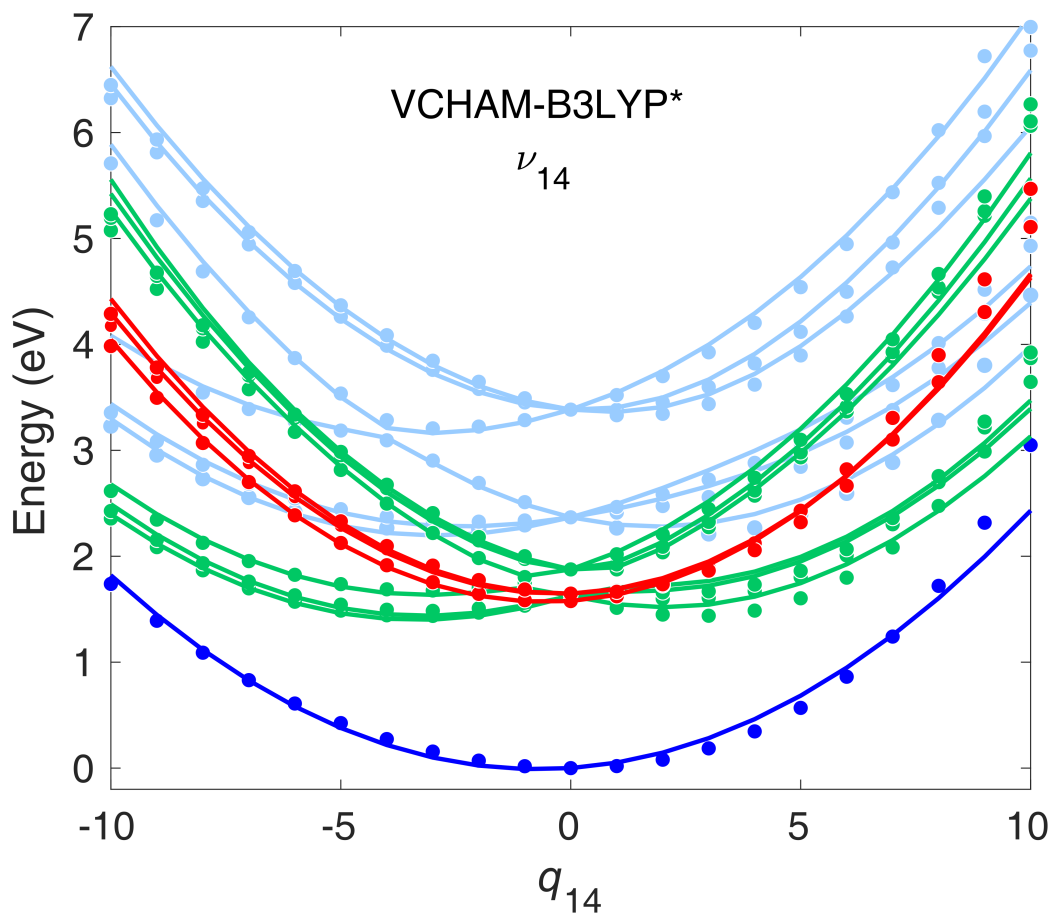

**Figure S4:** DFT/TD-DFT (B3LYP\*) adiabatic/spin-diabatic potential energy surfaces of  $[\text{Fe}(\text{NCH})_6]^{2+}$  along  $\nu_{14}$ . Obtained by using the VCHAM method. The dots are the energies calculated by quantum chemistry, while the lines correspond to their VCHAM fit. The following colour code is used: blue – ground state ( $S_0$ ), light blue – singlet excited states ( $S_1$ – $S_6$ ;  ${}^1T_{1g}$  and  ${}^1T_{2g}$ ), green – triplet excited states  $T_1$ – $T_6$ ;  ${}^3T_{1g}$  and  ${}^3T_{2g}$ ), red – quintet excited states ( $Q_1$ – $Q_3$ ;  ${}^5T_{2g}$ ).

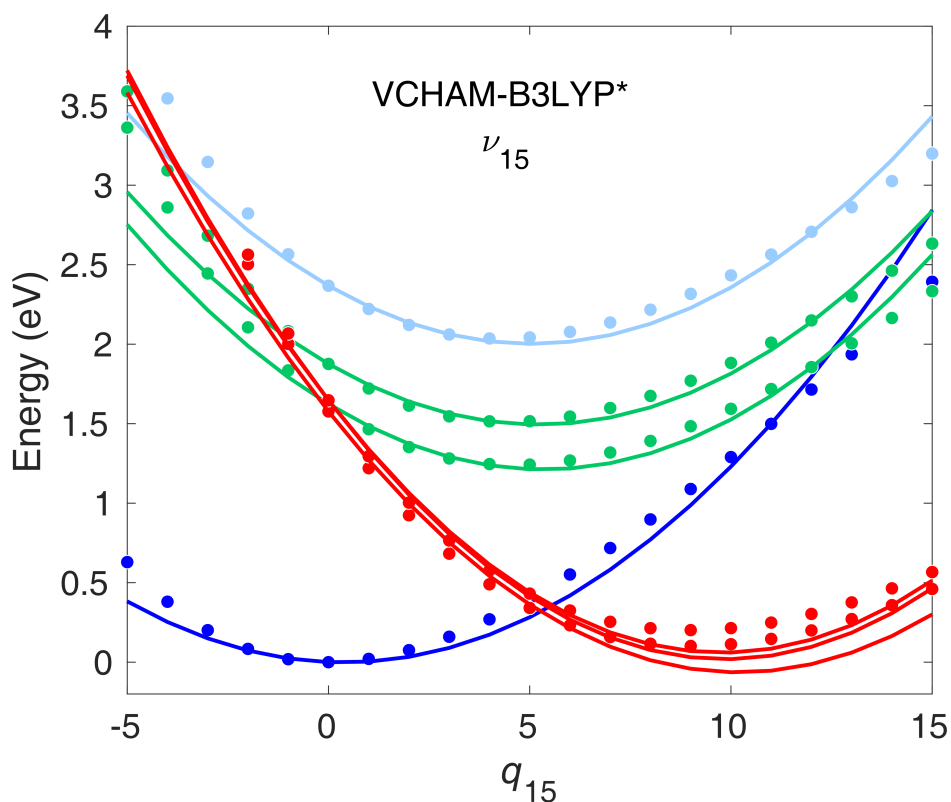

**Figure S5:** DFT/TD-DFT (B3LYP\*) adiabatic/spin-diabatic potential energy surfaces of  $[\text{Fe}(\text{NCH})_6]^{2+}$  along  $\nu_{15}$ . Obtained by using the VCHAM method. The dots are the energies calculated by quantum chemistry, while the lines correspond to their VCHAM fit. The following colour code is used: blue – ground state ( $S_0$ ), light blue – singlet excited states ( $S_1$ – $S_6$ ;  $^1T_{1g}$  and  $^1T_{2g}$ ), green – triplet excited states  $T_1$ – $T_6$ ;  $^3T_{1g}$  and  $^3T_{2g}$ ), red – quintet excited states ( $Q_1$ – $Q_3$ ;  $^5T_{2g}$ ).

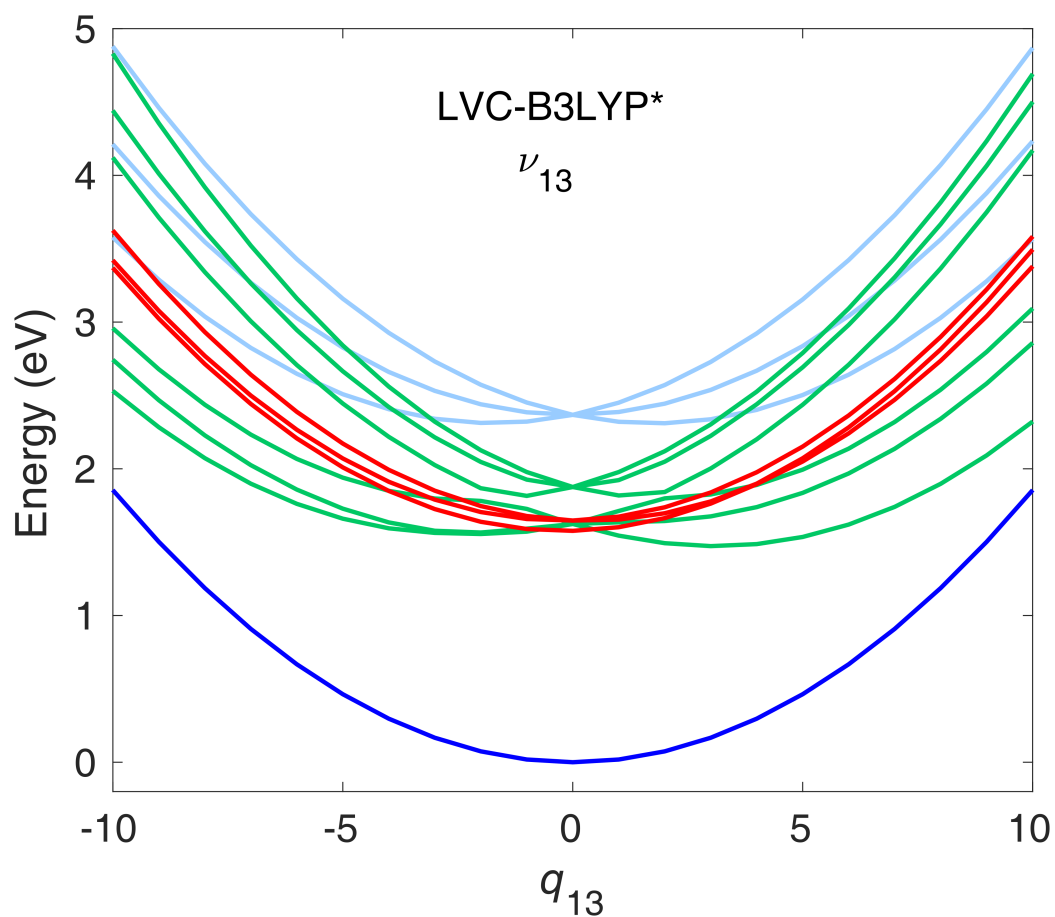

**Figure S6:** DFT/TD-DFT (B3LYP\*) adiabatic/spin-diabatic potential energy surfaces of  $[\text{Fe}(\text{NCH})_6]^{2+}$  along  $\nu_{13}$ . Obtained by using the LVC method. The following colour code is used: blue – ground state ( $S_0$ ), light blue – singlet excited states ( $S_1$ – $S_6$ ;  $^1T_{1g}$  and  $^1T_{2g}$ ), green – triplet excited states  $T_1$ – $T_6$ ;  $^3T_{1g}$  and  $^3T_{2g}$ ), red – quintet excited states ( $Q_1$ – $Q_3$ ;  $^5T_{2g}$ ).

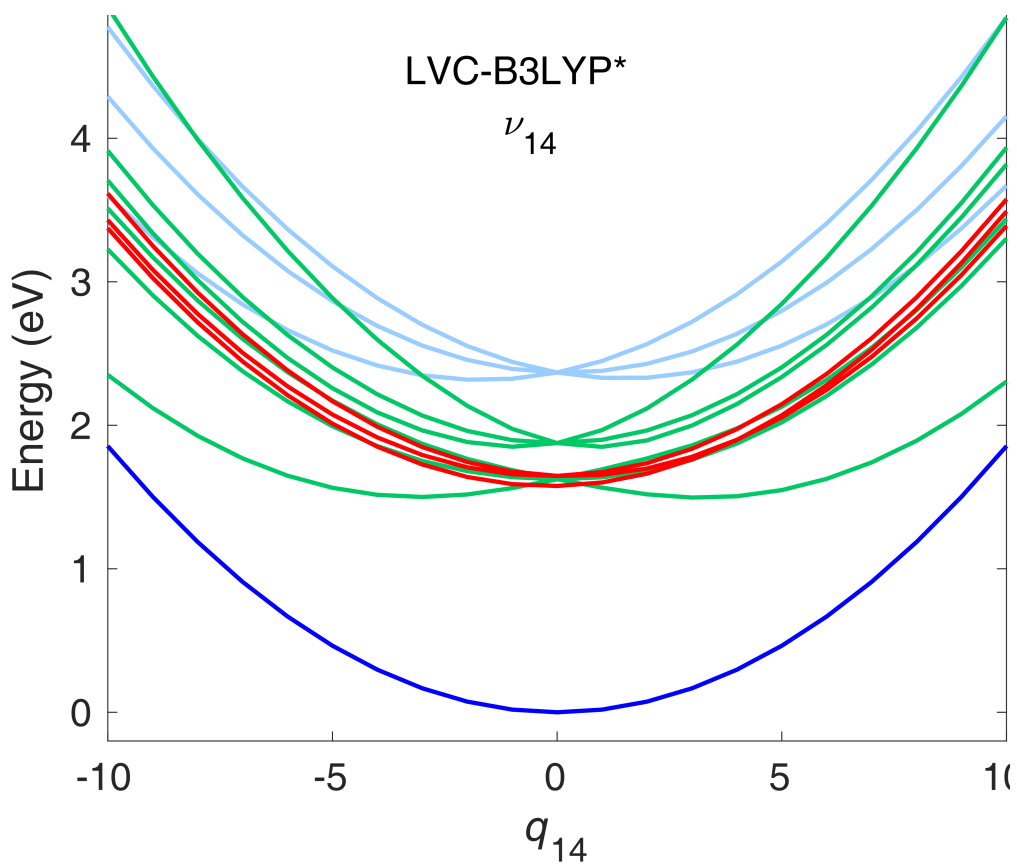

**Figure S7:** DFT/TD-DFT (B3LYP\*) adiabatic/spin-diabatic potential energy surfaces of  $[\text{Fe}(\text{NCH})_6]^{2+}$  along  $\nu_{14}$ . Obtained by using the LVC method. The following colour code is used: blue – ground state ( $S_0$ ), light blue – singlet excited states ( $S_1$ – $S_6$ ;  $^1T_{1g}$  and  $^1T_{2g}$ ), green – triplet excited states ( $T_1$ – $T_6$ ;  $^3T_{1g}$  and  $^3T_{2g}$ ), red – quintet excited states ( $Q_1$ – $Q_3$ ;  $^5T_{2g}$ ).

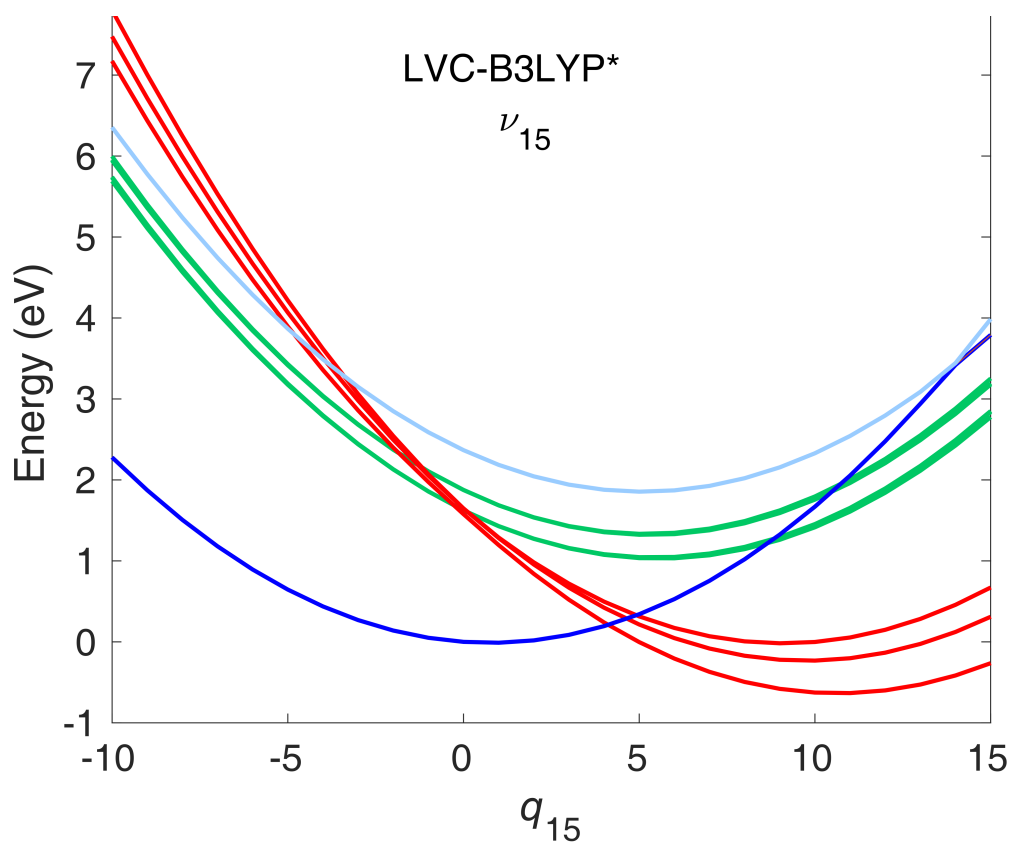

**Figure S8:** DFT/TD-DFT (B3LYP\*) adiabatic/spin-diabatic potential energy surfaces of  $[\text{Fe}(\text{NCH})_6]^{2+}$  along  $\nu_{15}$ . Obtained by using the LVC method. The following colour code is used: blue – ground state ( $S_0$ ), light blue – singlet excited states ( $S_1$ – $S_6$ ;  $^1T_{1g}$  and  $^1T_{2g}$ ), green – triplet excited states  $T_1$ – $T_6$ ;  $^3T_{1g}$  and  $^3T_{2g}$ ), red – quintet excited states ( $Q_1$ – $Q_3$ ;  $^5T_{2g}$ ).

## S4 Comparison of B3LYP\* and CASPT2 QD

Figure S9 shows the 3D QD populations dynamics obtained by the VCHAM-B3LYP\* and VCHAM-CASPT2<sup>1</sup> models. As is clear from the figure, the triplet IC is affected by the utilized quantum chemistry method. This is explained by the nearly twice as large  ${}^3T_{1g}$ - ${}^3T_{2g}$  energy gap (see Table S2), which is consistent with the differences observed in Figure S9.

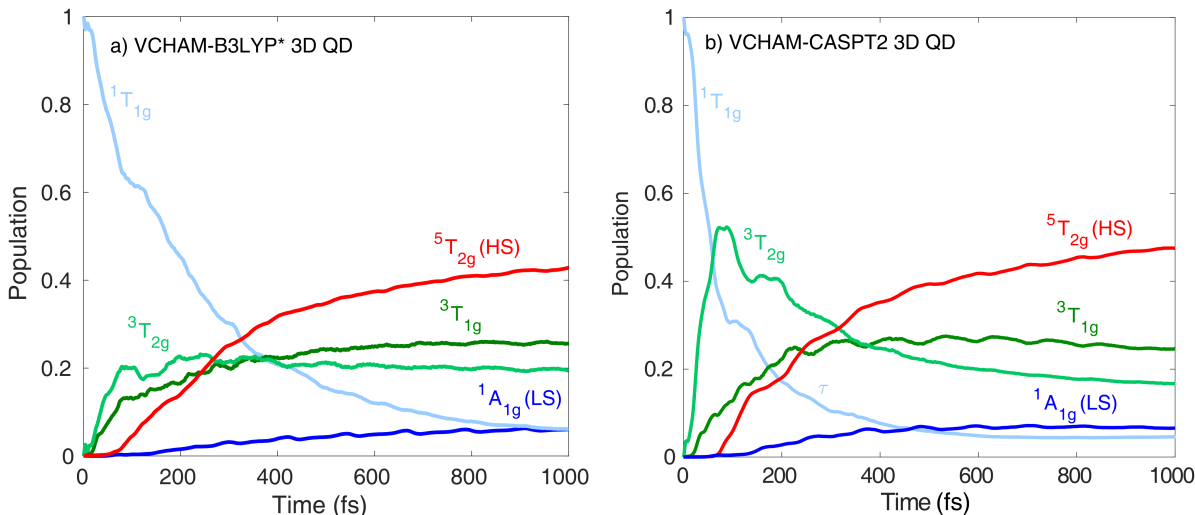

**Figure S9:** 3D QD diabatic population dynamics obtained by a) VCHAM-B3LYP\* and VCHAM-CASPT2.<sup>1</sup>

## S5 Description of Vibrational Dynamics by TSH and QD

We now assess how the TSH and QD methods describe the nuclear dynamics of photoexcited  $[\text{Fe}(\text{NCH})_6]^{2+}$ . For this analysis, we utilize our LVC-B3LYP\* Hamiltonian, which allows direct comparison of the TSH and QD results. Figure S10 shows the TSH nuclear dynamics along  $\nu_{13}$  and  $\nu_{15}$ . As seen in Figure S10, panel a, and also the single trajectory in Figure 5a in the article,  ${}^1A_{1g} \rightarrow {}^1T_{1g}$  excitation immediately activates  $\nu_{13}$ . Propagation occurs equally towards positive and negative  $q_{13}$  values, which is due to the antisymmetric character of  $\nu_{13}$ , which breaks the threefold symmetry of  ${}^1T_{1g}$ . This has the consequence that the average displacement cancels out (two components with the same magnitude but opposite sign), and thus  $\langle q_{13} \rangle$  is zero (thick black line in Figure

S10a). This is in line with a bifurcating wavepacket created by nonadiabatic coupling between the  ${}^1T_{1g}$  components. The ensemble of trajectories dephases and broadens in  $\sim 100 - 200$  fs, which is in agreement with our QD simulations on CASPT2 PESs.<sup>1</sup> From ca. 400 fs, weak, slowly growing oscillations appear in the average  $\langle q_{13} \rangle$ , which we attribute to the growing quintet population; this is supported by the asymmetry in the distribution of triplet-quintet hopping geometries projected to  $\nu_{13}$  shown in Figure 7a in the article.

The trajectories along the breathing mode  $\nu_{15}$  are displayed in Figure S10, panel b, which are very different from those along  $\nu_{13}$ , discussed above. The dynamics along  $\nu_{15}$  are characterized by coherent oscillations (breathing vibrations) with a period of ca. 100 fs with rather slow coherence decay. Initially, the oscillations turn at ca.  $q_{15} = -2$  and  $q_{15} = 12$ , which, according to the PESs along  $\nu_{15}$  (Figure S8) are consistent with vibrations along  $\nu_{15}$  in the singlet ( ${}^1T_{1g}$ ) and triplet ( ${}^3T_{1g}$ ,  ${}^3T_{2g}$ ) excited states, respectively. At the second oscillation period, a new component appears with an outer turning point at ca.  $q_{15} = 20$ , which is assigned to the quintet ( ${}^5T_{2g}$ ) states. At the next inner turning point, a third component arises between ca.  $q_{15} = -7$  and  $q_{15} = -8$ , which we assign to the ground state  ${}^1A_{1g}$ . These  $\nu_{15}$  structural features are clearly characteristic of the electronic character (shown in Figure S10, panel b), reflecting the  $e_g^*$  occupation ( ${}^1T_{1g}$ ,  ${}^3T_{1g}$ ,  ${}^3T_{2g}$  - single,  ${}^5T_{2g}$  - double,  ${}^1A_{1g}$  - zero occupation). The coherently oscillating average  $\langle q_{15} \rangle$  slowly shifts towards higher  $q_{15}$  values, which, as seen from Figure S10, panel b, is due to the  ${}^5T_{2g}$  component, whose relative weight (i.e., population) gradually increases in line with rising quintet population. We note that oscillations with the same period appear in the corresponding quintet population curve (Figure 4a in the article, red), evidencing that the triplet-quintet transition is controlled by breathing mode  $\nu_{15}$ .

Figure S11 shows the QD vibrational dynamics, characterized by the wavepacket centroids  $\langle q_i \rangle$  and widths  $dq_i$ , along  $\nu_{13}$  and  $\nu_{15}$ . Here,  $\langle q_i \rangle$  and  $dq_i$  were calculated by a weighted sum over the electronic states, with the weights being the relative populations. As in the case of TSH (Figure S10), the QD vibrational dynamics are dominated by the coherently oscillating breathing motion  $\nu_{15}$ , with the same period. The shift towards higher  $\langle q_{15} \rangle$  values due to the population of quintet states is again observed, and loss of coherence is even slower than for the TSH results shown in Figure S10, panel b, in fact, it is negligible. This is reasonable because our TSH model is full dimensional, which thus allows interaction of all modes, while our QD Hamiltonian includes only the three Fe-N stretching modes. Interestingly, our VCHAM-CASPT2 QD simulation with these three modes leads to a significantly faster coherence decay.<sup>3</sup> This means that the in the present case, the influence of vibronic effects, which are stronger for CASPT2, on the coherence decay is stronger than the presence of the bath of vibrational modes. Finally, the wavepacket along the antisymmetric mode  $\nu_{13}$  broadens similarly and on the same timescale as in the case of TSH dynamics. On the other hand, the centroid  $\langle q_{13} \rangle$  does not cancel initially but exhibits small oscillations that are slowly damped, in contrast to the slowly growing oscillations for TSH in Figure S10, panel a. The reason for this difference is that the preparation of the initial state is different: while a single *diabatic*  ${}^1T_{1g}$  component for QD, an *adiabatic*, i.e., a mixture of  ${}^1T_{1g}$  states for TSH. Note,



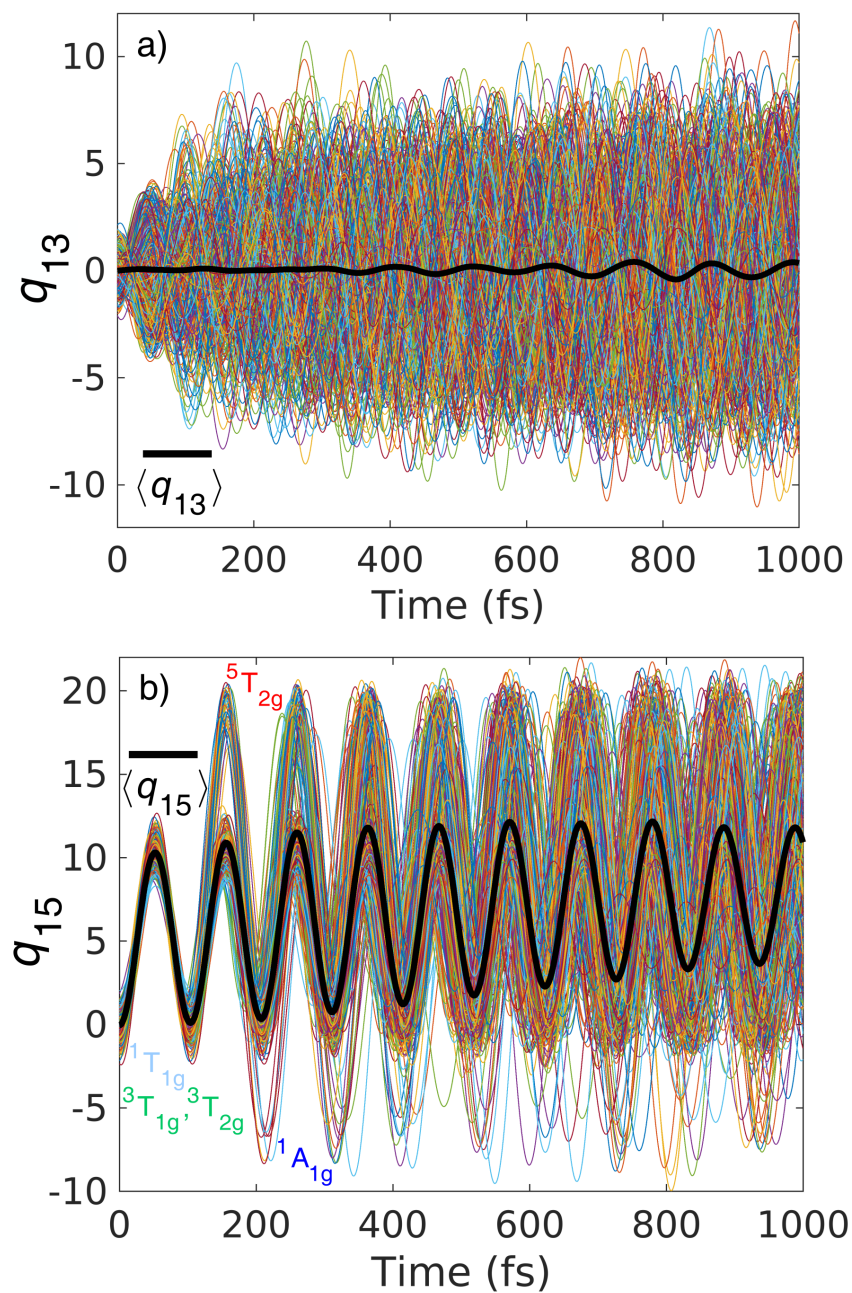

**Figure S10:** Nuclear dynamics along a)  $\nu_{13}$  and b)  $\nu_{15}$ , as obtained from the LVC-B3LYP\* TSH simulations. All 500 trajectories are shown as well as their average (thick black line). The trajectories along  $\nu_{15}$  are assigned to different electronic states; this assignment is given in panel b).

however, that due to the degeneracy of  ${}^1T_{1g}$  components within octahedral symmetry, this difference in the excitation scheme should not show up in any physical observable; indeed, the corresponding TSH and QD population dynamics show very good agreement (Figures 4a and 4c in the article).

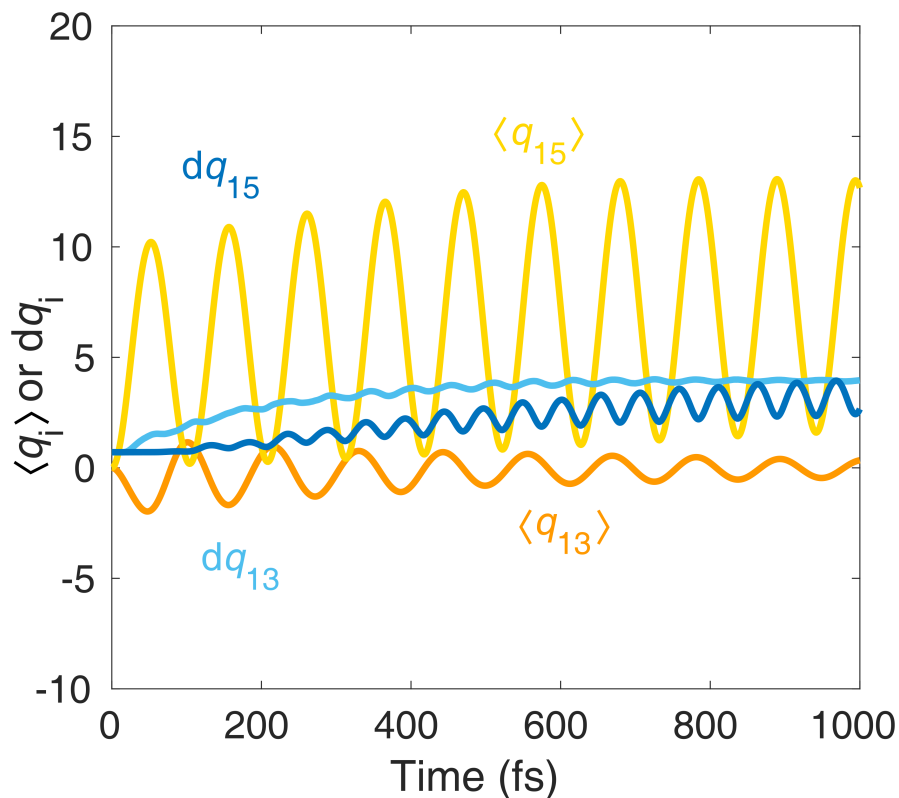

**Figure S11:** Nuclear dynamics along  $\nu_{13}$  and  $\nu_{15}$ , as obtained from the LVC-B3LYP\* QD simulations.  $\langle q_i \rangle$  and  $dq_i$  denote the centroid and width of the wavepacket, respectively.

## References

- [1] Pápai, M. *Inorg. Chem.* **2021**, *60*, 13950–13954.
- [2] All off-diagonal  $\lambda_i^{(\alpha\beta)}$  values are all negligible for mode  $\nu_{15}$  with a single exception:  $\sim 0.03$  eV, for quintet states obtained by LVC-B3LYP\*. This exceptional case likely occurs due to the quintet unrestricted DFT/TD-DFT treatment.
- [3] In ref. 1, the coherence decay is analyzed for the  ${}^5T_{2g}$  states, but the same trends hold for the full wavepacket.
